# Supplementary material for: Electronic structure and luminescence properties of unique complexes: cyclometalated iridium(iii) chelated by o-carboranyl-pyridine ligands
Source: Royal Society of Chemistry journal article supplement (doi:10.1039/c8nj00428e), 2018-01-01
Supplement: c8nj00428e1.pdf [file c8nj00428e1.pdf]

**Electronic structure and luminescence properties of unique  
complexes: cyclometalating iridium(III) chelated by o-carboranyl-  
pyridine ligand**

Huize Zhang<sup>a</sup>, Wenqian Li<sup>a</sup>, Xi Yan<sup>a</sup>, Wanlin Cai<sup>a</sup>, Ming Li<sup>a</sup>, Rongxing He<sup>a</sup> and Wei Shen<sup>a\*</sup>

<sup>1</sup> *School of Chemistry and Chemical Engineering, Southwest University, Chongqing 400715, China*

\* Corresponding authors at: School of Chemistry and Chemical Engineering,

Southwest University, Chongqing 400715, China.

E-mail addresses: [shenw@swu.edu.cn](mailto:shenw@swu.edu.cn) (W Shen)

**Table S1.** Selected bond lengths [ $\text{\AA}$ ], bond angles [deg] at  $S_0$  optimized geometry for complex **1**.

|               | B3LYP  | PBE0   | M052X  | M062X  | BMK    | CAM-B3LYP | Exp. <sup>a</sup> |
|---------------|--------|--------|--------|--------|--------|-----------|-------------------|
| Ir-C(1)       | 2.236  | 2.192  | 2.191  | 2.209  | 2.193  | 2.212     | 2.175             |
| Ir-C(8)       | 2.057  | 2.038  | 2.038  | 2.031  | 2.071  | 2.049     | 2.055             |
| Ir-C(19)      | 2.015  | 1.999  | 1.992  | 1.984  | 2.021  | 2.008     | 2.030             |
| Ir-N(1)       | 2.290  | 2.235  | 2.262  | 2.297  | 2.242  | 2.259     | 2.227             |
| Ir-N(2)       | 2.114  | 2.084  | 2.106  | 2.112  | 2.136  | 2.104     | 2.098             |
| Ir-N(3)       | 2.075  | 2.048  | 2.063  | 2.063  | 2.107  | 2.067     | 2.039             |
| C(1)-C(2)     | 1.680  | 1.660  | 1.647  | 1.655  | 1.793  | 1.660     | 1.703             |
| C(2)-C(3)     | 1.499  | 1.492  | 1.494  | 1.499  | 1.510  | 1.496     | 1.512             |
| C(1)-Ir-N(1)  | 77.33  | 78.18  | 77.98  | 77.32  | 79.47  | 77.84     | 78.60             |
| C(1)-Ir-C(19) | 96.36  | 95.82  | 95.72  | 95.95  | 94.81  | 96.13     | 95.70             |
| C(8)-Ir-N(1)  | 93.04  | 92.74  | 92.77  | 93.10  | 93.03  | 93.06     | 92.30             |
| C(8)-Ir-C(19) | 93.43  | 93.39  | 93.61  | 93.73  | 92.96  | 93.10     | 93.50             |
| C(1)-Ir-N(2)  | 99.02  | 99.06  | 99.55  | 99.32  | 98.66  | 99.32     | 99.00             |
| C(8)-Ir-N(2)  | 78.92  | 79.21  | 79.24  | 79.31  | 78.86  | 79.01     | 80.40             |
| C(19)-Ir-N(2) | 93.26  | 93.02  | 93.29  | 93.40  | 92.09  | 92.94     | 92.10             |
| N(1)-Ir-N(2)  | 92.73  | 92.65  | 92.61  | 92.63  | 94.79  | 92.96     | 93.60             |
| C(1)-Ir-N(3)  | 91.91  | 91.89  | 91.52  | 91.28  | 93.05  | 91.90     | 93.20             |
| C(8)-Ir-N(3)  | 91.20  | 90.83  | 90.64  | 91.03  | 90.42  | 90.80     | 88.60             |
| C(19)-Ir-N(3) | 80.12  | 80.37  | 80.53  | 80.67  | 80.11  | 80.17     | 80.20             |
| N(1)-Ir-N(3)  | 94.91  | 94.95  | 94.62  | 94.37  | 94.01  | 94.93     | 95.10             |
| N(2)-Ir-N(3)  | 167.83 | 167.76 | 167.84 | 168.37 | 166.46 | 167.44    | 166.20            |

<sup>a</sup> Experimental data is obtained from ref. 29**Table S2.** Calculated maximum emission wavelengths ( $\lambda_{\text{max}}$ , nm) for complex **1** with different functionals.

| nm                    | B3LYP | PBE0 | M062X | M052X | BMK | CAM-B3LYP | Exp. <sup>a</sup> |
|-----------------------|-------|------|-------|-------|-----|-----------|-------------------|
| $\lambda_{\text{em}}$ | 573   | 571  | 482   | 508   | 465 | 559       | 517               |

<sup>a</sup> Experimental data is obtained from ref. 29

**Table S3.** The analysis of the molecular orbital compositions in the lowest-lying triplet state for all complexes at the TDDFT/M052X level.

| Orbitals  | transitions (%) | Energy (eV)    | MO compositions |        |    |      | Composition contribution > 11% |                  |
|-----------|-----------------|----------------|-----------------|--------|----|------|--------------------------------|------------------|
|           |                 |                | (C^N)1          | (C^N)2 | Ir | CBpy |                                |                  |
| <b>1</b>  | H-1             | H-1→L<br>(50%) | -7.25           | 23     | 68 | 5    | 4                              | (C^N)1+C^N)2     |
|           | H               | H→L (37%)      | -6.46           | 40     | 24 | 27   | 8                              | (C^N)1+(C^N)2+Ir |
|           | L               |                | -1.03           | 1      | 92 | 4    | 3                              | (C^N)2           |
| <b>2</b>  | H-1             | H-1→L<br>(29%) | -7.28           | 30     | 58 | 10   | 2                              | (C^N)1+(C^N)2    |
|           | H               | H→L (42%)      | -6.25           | 40     | 22 | 28   | 11                             | (C^N)1+(C^N)2+Ir |
|           | L               |                | -1.2            | 1      | 94 | 4    | 1                              | (C^N)2           |
| <b>3</b>  | H-1             | H-1→L<br>(11%) | -7.1            | 22     | 71 | 6    | 2                              | (C^N)1+(C^N)2    |
|           | H               | H→L (58%)      | -6.28           | 66     | 12 | 17   | 5                              | (C^N)1+(C^N)2+Ir |
|           | L               |                | -1.15           | 90     | 7  | 1    | 2                              | (C^N)1           |
| <b>3a</b> | H               | H→L (41%)      | -6.27           | 55     | 15 | 22   | 7                              | (C^N)1+(C^N)2+Ir |
|           | L               | H→L+1(13%)     | -1.01           | 60     | 36 | 2    | 2                              | (C^N)1+(C^N)2    |
|           | L+1             |                | -0.86           | 35     | 60 | 3    | 3                              | (C^N)1+(C^N)2    |
| <b>4</b>  | H-1             | H-1→L<br>(13%) | -0.8            | 35     | 53 | 11   | 1                              | (C^N)1+(C^N)2    |
|           | H               | H→L (60%)      | -6.18           | 75     | 7  | 13   | 4                              | (C^N)1+Ir        |
|           | L               |                | -1.04           | 96     | 2  | 1    | 1                              | (C^N)1           |
| <b>4a</b> | H               | H→L (86%)      | -6.13           | 85     | 4  | 9    | 2                              | (C^N)1           |
|           | L               |                | -1.06           | 89     | 2  | 3    | 5                              | (C^N)1           |
| <b>5</b>  | H-1             | H-1→L (23%)    | -6.97           | 41     | 52 | 5    | 1                              | (C^N)1+(C^N)2    |
|           | H               | H→L (46%)      | -6.32           | 62     | 13 | 20   | 5                              | (C^N)1+(C^N)2+Ir |
|           | L               |                | -1.31           | 96     | 1  | 1    | 2                              | (C^N)1           |

|           |     |             |       |    |    |    |   |                                                                      |
|-----------|-----|-------------|-------|----|----|----|---|----------------------------------------------------------------------|
|           | H-1 | H-1→L (35%) | -6.78 | 43 | 39 | 13 | 5 | (C <sup>^</sup> N) <sub>1</sub> +(C <sup>^</sup> N) <sub>2</sub> +Ir |
| <b>5a</b> | H   | H→L (61%)   | -6.61 | 20 | 60 | 17 | 2 | (C <sup>^</sup> N) <sub>1</sub> +(C <sup>^</sup> N) <sub>2</sub> +Ir |
|           | L   |             | -1.66 | 0  | 95 | 3  | 1 | (C <sup>^</sup> N) <sub>2</sub>                                      |

**Table S4.** Transition dipole moments  $\mu(S_n)$  (Debye) for  $S_0$ - $S_n$  transitions, singlet-triplet splitting energies  $\Delta E(S_n-T_1)$  (eV) and the SOC matrix elements  $\langle S_n | H_{\text{soc}} | T_1 \rangle$  of all complexes.

| $S_n$    | <b>1</b>   |                     |                                              | <b>2</b>   |                     |                                              |
|----------|------------|---------------------|----------------------------------------------|------------|---------------------|----------------------------------------------|
|          | $\mu(S_n)$ | $\Delta E(S_n-T_1)$ | $\langle S_n   H_{\text{soc}}   T_1 \rangle$ | $\mu(S_n)$ | $\Delta E(S_n-T_1)$ | $\langle S_n   H_{\text{soc}}   T_1 \rangle$ |
| $S_1$    | 1.09       | 0.34                | 22.13                                        | 2.61       | 0.38                | 10.26                                        |
| $S_2$    | 0.94       | 0.80                | 20.27                                        | 2.68       | 0.45                | 368.19                                       |
| $S_3$    | 0.47       | 0.88                | 50.04                                        | 3.08       | 0.85                | 408.52                                       |
| $S_4$    | 0.92       | 1.15                | 461.15                                       | 3.26       | 1.03                | 499.59                                       |
| $S_5$    | 0.36       | 1.20                | 90.89                                        | 3.42       | 1.20                | 72.74                                        |
| $S_6$    | 0.67       | 1.34                | 417.83                                       | 3.44       | 1.21                | 174.01                                       |
| $S_7$    | 0.67       | 1.38                | 54.11                                        | 1.64       | 1.21                | 104.056                                      |
| $S_8$    | 0.15       | 1.48                | 70.95                                        | 1.56       | 1.30                | 131.915                                      |
| $S_9$    | 0.08       | 1.59                | 332.73                                       | 0.67       | 1.42                | 24.070                                       |
| $S_{10}$ | 1.06       | 1.63                | 116.60                                       | 0.45       | 1.45                | 45.150                                       |
| $S_n$    | <b>3</b>   |                     |                                              | <b>3a</b>  |                     |                                              |
|          | $\mu(S_n)$ | $\Delta E(S_n-T_1)$ | $\langle S_n   H_{\text{soc}}   T_1 \rangle$ | $\mu(S_n)$ | $\Delta E(S_n-T_1)$ | $\langle S_n   H_{\text{soc}}   T_1 \rangle$ |
| $S_1$    | 0.87       | 0.65                | 104.90                                       | 1.65       | 0.29                | 21.65                                        |
| $S_2$    | 0.99       | 0.80                | 48.03                                        | 0.47       | 0.40                | 445.80                                       |
| $S_3$    | 0.15       | 1.16                | 25.76                                        | 0.17       | 0.81                | 430.89                                       |
| $S_4$    | 0.77       | 1.41                | 48.98                                        | 0.46       | 0.86                | 1037.63                                      |
| $S_5$    | 0.77       | 1.47                | 177.55                                       | 0.58       | 0.99                | 6.23                                         |
| $S_6$    | 1.09       | 1.54                | 91.02                                        | 3.07       | 1.26                | 195.61                                       |
| $S_7$    | 1.59       | 1.62                | 181.91                                       | 1.40       | 1.29                | 3.36                                         |
| $S_8$    | 0.56       | 1.66                | 16.69                                        | 0.35       | 1.36                | 21.15                                        |
| $S_9$    | 0.39       | 1.71                | 831.67                                       | 0.65       | 1.40                | 24.04                                        |
| $S_{10}$ | 0.21       | 1.74                | 42.79                                        | 1.29       | 1.42                | 43.67                                        |
| $S_n$    | <b>4</b>   |                     |                                              | <b>4a</b>  |                     |                                              |
|          | $\mu(S_n)$ | $\Delta E(S_n-T_1)$ | $\langle S_n   H_{\text{soc}}   T_1 \rangle$ | $\mu(S_n)$ | $\Delta E(S_n-T_1)$ | $\langle S_n   H_{\text{soc}}   T_1 \rangle$ |
| $S_1$    | 0.90       | 0.77                | 63.78                                        | 0.73       | 0.91                | 58.30                                        |
| $S_2$    | 0.54       | 0.83                | 12.93                                        | 1.67       | 0.94                | 23.02                                        |
| $S_3$    | 0.19       | 1.25                | 6.37                                         | 0.40       | 1.32                | 40.00                                        |
| $S_4$    | 0.23       | 1.41                | 28.97                                        | 1.08       | 1.51                | 14.91                                        |
| $S_5$    | 1.57       | 1.49                | 87.04                                        | 1.90       | 1.59                | 101.66                                       |
| $S_6$    | 0.98       | 1.52                | 64.55                                        | 0.32       | 1.69                | 71.31                                        |
| $S_7$    | 0.63       | 1.60                | 19.99                                        | 0.30       | 1.81                | 71.65                                        |
| $S_8$    | 1.19       | 1.82                | 129.77                                       | 0.97       | 1.86                | 162.09                                       |
| $S_9$    | 0.11       | 1.86                | 12.85                                        | 1.40       | 1.87                | 41.63                                        |
| $S_{10}$ | 0.66       | 1.86                | 84.75                                        | 0.66       | 1.91                | 62.97                                        |
| $S_n$    | <b>5</b>   |                     |                                              | <b>5a</b>  |                     |                                              |
|          | $\mu(S_n)$ | $\Delta E(S_n-T_1)$ | $\langle S_n   H_{\text{soc}}   T_1 \rangle$ | $\mu(S_n)$ | $\Delta E(S_n-T_1)$ | $\langle S_n   H_{\text{soc}}   T_1 \rangle$ |
| $S_1$    | 0.68       | 0.62                | 106.48                                       | 1.37       | 0.79                | 191.06                                       |
| $S_2$    | 0.22       | 0.97                | 22.21                                        | 1.40       | 1.17                | 106.17                                       |
| $S_3$    | 1.12       | 1.30                | 19.29                                        | 1.38       | 1.26                | 16.16                                        |

|                 |      |      |        |      |      |        |
|-----------------|------|------|--------|------|------|--------|
| S <sub>4</sub>  | 0.54 | 1.33 | 23.41  | 0.77 | 1.43 | 287.92 |
| S <sub>5</sub>  | 0.33 | 1.41 | 131.99 | 0.55 | 1.59 | 50.58  |
| S <sub>6</sub>  | 0.75 | 1.50 | 144.86 | 1.59 | 1.74 | 183.14 |
| S <sub>7</sub>  | 1.84 | 1.67 | 221.54 | 0.24 | 1.76 | 38.30  |
| S <sub>8</sub>  | 0.91 | 1.69 | 73.90  | 0.48 | 1.85 | 173.18 |
| S <sub>9</sub>  | 1.35 | 1.78 | 155.05 | 1.25 | 1.93 | 256.24 |
| S <sub>10</sub> | 0.82 | 1.80 | 202.02 | 1.27 | 1.99 | 34.11  |

**Table S5.** Vibrational frequencies ( $\omega_i/\text{cm}^{-1}$ ) at the respective optimized S<sub>0</sub> states, Shift vector K<sub>i</sub> (a.u.) and Huang-Rhys factor S<sub>i</sub> of complex **1**

|    | $\omega_i/\text{cm}^{-1}$ | K <sub>i</sub> (a.u.) | S <sub>i</sub> |
|----|---------------------------|-----------------------|----------------|
| 1  | 31.9653                   | -1.63E+02             | 1.94           |
| 2  | 39.5145                   | 1.14E+01              | 0.01           |
| 3  | 43.2616                   | 8.16E+00              | 0.01           |
| 4  | 46.0543                   | 3.32E+01              | 0.12           |
| 5  | 48.6892                   | 2.27E+01              | 0.06           |
| 6  | 70.6156                   | -2.33E+01             | 0.09           |
| 7  | 77.051                    | -2.99E+01             | 0.16           |
| 8  | 87.3185                   | 9.41E+00              | 0.02           |
| 9  | 96.2327                   | -1.44E+01             | 0.05           |
| 10 | 117.2739                  | -1.45E+01             | 0.06           |
| 11 | 131.4226                  | -8.39E+00             | 0.02           |
| 12 | 136.4327                  | -5.64E+00             | 0.01           |
| 13 | 137.7165                  | -3.35E+01             | 0.35           |
| 14 | 148.7184                  | -4.79E+00             | 0.01           |
| 15 | 155.8458                  | -4.77E+00             | 0.01           |
| 16 | 174.1687                  | -4.60E+00             | 0.01           |
| 17 | 186.9596                  | -4.21E+00             | 0.01           |
| 18 | 201.8193                  | 3.78E+00              | 0.01           |
| 19 | 206.6192                  | 4.11E+00              | 0.01           |
| 20 | 214.4651                  | -5.16E+00             | 0.01           |
| 21 | 239.1142                  | -1.90E+01             | 0.20           |
| 22 | 258.821                   | -5.85E+00             | 0.02           |
| 23 | 275.7784                  | 3.32E+00              | 0.01           |
| 24 | 281.0366                  | 1.71E+01              | 0.19           |
| 25 | 282.1662                  | 6.92E+00              | 0.03           |
| 26 | 295.904                   | -6.09E+00             | 0.03           |
| 27 | 300.3628                  | -3.08E+00             | 0.01           |
| 28 | 327.1147                  | -4.52E+00             | 0.02           |
| 29 | 362.5773                  | 3.19E+00              | 0.01           |
| 30 | 379.7033                  | 2.64E+00              | 0.01           |
| 31 | 393.4667                  | 7.39E+00              | 0.05           |
| 32 | 403.8377                  | 1.03E+01              | 0.10           |
| 33 | 427.0024                  | -3.28E+00             | 0.01           |
| 34 | 435.2586                  | 3.72E+00              | 0.01           |
| 35 | 448.9246                  | 3.32E+00              | 0.01           |
| 36 | 457.0683                  | -3.24E+00             | 0.01           |
| 37 | 469.9991                  | -5.91E+00             | 0.04           |
| 38 | 483.433                   | -2.75E+00             | 0.01           |
| 39 | 488.712                   | 9.12E+00              | 0.09           |

|    |          |           |      |
|----|----------|-----------|------|
| 40 | 497.3784 | 2.11E+00  | 0.01 |
| 41 | 501.5825 | -2.50E+00 | 0.01 |
| 42 | 506.4179 | -4.84E+00 | 0.03 |
| 43 | 511.2945 | -3.15E+00 | 0.01 |
| 44 | 514.0748 | 2.38E+00  | 0.01 |
| 45 | 548.7108 | -3.36E+00 | 0.01 |
| 46 | 573.2549 | 5.27E+00  | 0.04 |
| 47 | 586.6248 | 2.46E+00  | 0.01 |
| 48 | 589.0658 | -4.65E+00 | 0.03 |
| 49 | 597.8848 | -1.78E+00 | 0.00 |
| 50 | 605.1359 | -1.61E+00 | 0.00 |
| 51 | 607.1396 | 2.15E+00  | 0.01 |
| 52 | 612.6764 | 4.19E+00  | 0.02 |
| 53 | 624.9666 | 1.61E+00  | 0.00 |
| 54 | 636.7301 | -8.19E+00 | 0.10 |
| 55 | 641.915  | 1.25E+00  | 0.00 |
| 56 | 651.5463 | 1.37E+00  | 0.00 |
| 57 | 654.3275 | 1.49E+00  | 0.00 |
| 58 | 666.4936 | -2.15E+00 | 0.01 |
| 59 | 668.7696 | -1.15E+00 | 0.00 |
| 60 | 677.715  | 1.38E+00  | 0.00 |
| 61 | 681.3229 | -1.41E+00 | 0.00 |
| 62 | 693.6924 | 1.66E+00  | 0.00 |
| 63 | 699.8194 | 2.06E+00  | 0.01 |
| 64 | 704.8208 | -1.56E+00 | 0.00 |
| 65 | 713.8814 | 1.07E+00  | 0.00 |
| 66 | 718.5379 | -1.30E+00 | 0.00 |
| 67 | 722.3213 | 1.89E+00  | 0.01 |
| 68 | 728.3329 | 1.07E+00  | 0.00 |
| 69 | 742.5679 | 1.77E+00  | 0.01 |
| 70 | 744.4192 | 1.22E+00  | 0.00 |
| 71 | 747.5813 | 8.92E-01  | 0.00 |
| 72 | 749.4269 | -2.46E+00 | 0.01 |
| 73 | 752.4201 | -1.25E+00 | 0.00 |
| 74 | 757.9722 | 1.35E+00  | 0.00 |
| 75 | 758.2277 | -2.96E+00 | 0.02 |
| 76 | 761.6585 | 1.13E+00  | 0.00 |
| 77 | 767.1129 | 1.30E+00  | 0.00 |
| 78 | 768.7016 | 1.23E+00  | 0.00 |
| 79 | 771.3231 | -2.59E+00 | 0.01 |
| 80 | 775.0644 | -1.00E+00 | 0.00 |
| 81 | 777.447  | 1.14E+00  | 0.00 |
| 82 | 778.3688 | -1.05E+00 | 0.00 |
| 83 | 783.5113 | 1.03E+00  | 0.00 |
| 84 | 789.1361 | 1.07E+00  | 0.00 |
| 85 | 792.0541 | -8.83E-01 | 0.00 |
| 86 | 799.3002 | 1.02E+00  | 0.00 |
| 87 | 804.32   | 1.30E+00  | 0.00 |
| 88 | 810.2072 | 1.62E+00  | 0.00 |
| 89 | 819.2041 | -8.31E-01 | 0.00 |
| 90 | 821.2465 | -7.08E-01 | 0.00 |

|     |           |           |      |
|-----|-----------|-----------|------|
| 91  | 821.9884  | 1.17E+00  | 0.00 |
| 92  | 825.415   | -1.08E+00 | 0.00 |
| 93  | 850.8431  | 7.93E-01  | 0.00 |
| 94  | 878.7285  | -9.26E-01 | 0.00 |
| 95  | 893.2427  | 9.97E-01  | 0.00 |
| 96  | 900.9781  | -1.04E+00 | 0.00 |
| 97  | 911.7432  | -7.81E-01 | 0.00 |
| 98  | 913.9158  | -7.55E-01 | 0.00 |
| 99  | 917.3997  | -2.07E+00 | 0.01 |
| 100 | 930.1209  | -6.10E-01 | 0.00 |
| 101 | 934.2309  | -1.36E+00 | 0.00 |
| 102 | 938.682   | -1.19E+00 | 0.00 |
| 103 | 942.3432  | 7.32E-01  | 0.00 |
| 104 | 944.8213  | -6.84E-01 | 0.00 |
| 105 | 948.289   | 5.64E-01  | 0.00 |
| 106 | 950.6922  | -1.04E+00 | 0.00 |
| 107 | 953.2269  | 5.85E-01  | 0.00 |
| 108 | 954.2841  | 7.24E-01  | 0.00 |
| 109 | 955.4802  | -5.12E-01 | 0.00 |
| 110 | 956.9953  | -6.02E-01 | 0.00 |
| 111 | 961.1678  | 9.53E-01  | 0.00 |
| 112 | 962.5578  | 6.26E-01  | 0.00 |
| 113 | 965.8372  | 4.68E-01  | 0.00 |
| 114 | 969.4191  | -7.09E-01 | 0.00 |
| 115 | 971.8452  | 6.03E-01  | 0.00 |
| 116 | 973.0818  | -4.77E-01 | 0.00 |
| 117 | 976.1474  | -7.63E-01 | 0.00 |
| 118 | 981.0222  | 4.80E-01  | 0.00 |
| 119 | 981.7052  | -4.50E-01 | 0.00 |
| 120 | 987.2827  | 4.58E-01  | 0.00 |
| 121 | 990.1129  | 2.88E-01  | 0.00 |
| 122 | 1006.0367 | -9.03E-01 | 0.00 |
| 123 | 1008.4246 | 5.12E-01  | 0.00 |
| 124 | 1011.0018 | 4.82E-01  | 0.00 |
| 125 | 1016.0572 | 4.33E-01  | 0.00 |
| 126 | 1020.3087 | -6.53E-01 | 0.00 |
| 127 | 1034.5041 | 8.05E-01  | 0.00 |
| 128 | 1037.4512 | -4.74E-01 | 0.00 |
| 129 | 1038.6924 | -4.84E-01 | 0.00 |
| 130 | 1045.4731 | 4.93E-01  | 0.00 |
| 131 | 1046.4241 | 3.67E-01  | 0.00 |
| 132 | 1052.8514 | -5.15E-01 | 0.00 |
| 133 | 1057.5483 | -4.52E-01 | 0.00 |
| 134 | 1064.69   | -5.78E-01 | 0.00 |
| 135 | 1070.3989 | 3.81E-01  | 0.00 |
| 136 | 1077.8269 | -2.01E-01 | 0.00 |
| 137 | 1091.2836 | -4.55E-01 | 0.00 |
| 138 | 1096.3042 | 1.97E-01  | 0.00 |
| 139 | 1104.3429 | -3.88E-01 | 0.00 |
| 140 | 1116.7075 | -4.97E-01 | 0.00 |
| 141 | 1139.287  | -4.33E-01 | 0.00 |

|     |           |           |      |
|-----|-----------|-----------|------|
| 142 | 1149.585  | -4.41E-01 | 0.00 |
| 143 | 1150.9692 | -3.27E-01 | 0.00 |
| 144 | 1168.3219 | 3.23E-01  | 0.00 |
| 145 | 1170.2247 | 1.78E-01  | 0.00 |
| 146 | 1177.3958 | -2.72E-01 | 0.00 |
| 147 | 1188.3999 | -2.76E-01 | 0.00 |
| 148 | 1194.163  | -1.66E-01 | 0.00 |
| 149 | 1194.9665 | 3.03E-01  | 0.00 |
| 150 | 1201.8381 | -1.55E-01 | 0.00 |
| 151 | 1214.0002 | 2.84E-01  | 0.00 |
| 152 | 1282.7048 | -2.56E-01 | 0.00 |
| 153 | 1296.8471 | 2.59E-01  | 0.00 |
| 154 | 1325.9203 | -2.83E-01 | 0.00 |
| 155 | 1333.6742 | 2.81E-01  | 0.00 |
| 156 | 1340.4308 | -2.76E-01 | 0.00 |
| 157 | 1346.9866 | 2.80E-01  | 0.00 |
| 158 | 1348.0501 | 2.43E-01  | 0.00 |
| 159 | 1356.5565 | 1.28E-01  | 0.00 |
| 160 | 1362.8418 | 1.88E-01  | 0.00 |
| 161 | 1369.5408 | -1.81E-01 | 0.00 |
| 162 | 1380.8556 | 1.56E-01  | 0.00 |
| 163 | 1403.529  | 1.99E-01  | 0.00 |
| 164 | 1452.2614 | -2.11E-01 | 0.00 |
| 165 | 1464.0678 | -1.67E-01 | 0.00 |
| 166 | 1473.7954 | -1.75E-01 | 0.00 |
| 167 | 1483.5739 | 9.45E-02  | 0.00 |
| 168 | 1488.8279 | 9.86E-02  | 0.00 |
| 169 | 1496.7746 | 1.49E-01  | 0.00 |
| 170 | 1511.6877 | 1.64E-01  | 0.00 |
| 171 | 1519.607  | 1.90E-01  | 0.00 |
| 172 | 1532.5881 | 1.43E-01  | 0.00 |
| 173 | 1544.8395 | 7.37E-02  | 0.00 |
| 174 | 1548.986  | -1.24E-01 | 0.00 |
| 175 | 1562.1661 | -6.43E-02 | 0.00 |
| 176 | 1594.9683 | 7.09E-02  | 0.00 |
| 177 | 1619.0892 | 1.10E-01  | 0.00 |
| 178 | 1625.767  | 1.10E-01  | 0.00 |
| 179 | 1647.3358 | -1.34E-01 | 0.00 |
| 180 | 1649.5353 | 1.17E-01  | 0.00 |
| 181 | 1660.8043 | 1.01E-01  | 0.00 |
| 182 | 1683.7637 | -6.12E-02 | 0.00 |
| 183 | 1690.8924 | -1.27E-01 | 0.00 |
| 184 | 2686.9447 | 9.10E-02  | 0.00 |
| 185 | 2687.9885 | -5.36E-02 | 0.00 |
| 186 | 2691.1245 | -9.11E-02 | 0.00 |
| 187 | 2694.527  | 5.26E-02  | 0.00 |
| 188 | 2700.0839 | -4.53E-02 | 0.00 |
| 189 | 2700.3443 | 7.69E-02  | 0.00 |
| 190 | 2709.2677 | -3.63E-02 | 0.00 |
| 191 | 2716.0659 | 8.06E-02  | 0.00 |
| 192 | 2758.5359 | -7.17E-02 | 0.00 |



|     |           |           |      |
|-----|-----------|-----------|------|
| 193 | 2774.5168 | -2.91E-02 | 0.00 |
| 194 | 3203.2953 | 2.41E-02  | 0.00 |
| 195 | 3210.1687 | 2.36E-02  | 0.00 |
| 196 | 3215.7948 | 1.99E-02  | 0.00 |
| 197 | 3217.6031 | 3.40E-02  | 0.00 |
| 198 | 3222.9188 | 3.63E-02  | 0.00 |
| 199 | 3227.754  | -2.97E-02 | 0.00 |
| 200 | 3233.5471 | -1.55E-02 | 0.00 |
| 201 | 3233.808  | -1.66E-02 | 0.00 |
| 202 | 3236.8932 | 2.24E-02  | 0.00 |
| 203 | 3237.5843 | -1.26E-02 | 0.00 |
| 204 | 3243.6212 | -1.14E-02 | 0.00 |
| 205 | 3245.3823 | -1.91E-02 | 0.00 |
| 206 | 3252.3708 | -1.37E-02 | 0.00 |
| 207 | 3254.4437 | -1.39E-02 | 0.00 |
| 208 | 3255.678  | -5.34E-03 | 0.00 |
| 209 | 3257.4482 | 9.17E-03  | 0.00 |
| 210 | 3261.6921 | 4.85E-03  | 0.00 |
| 211 | 3268.082  | 3.54E-03  | 0.00 |
| 212 | 3273.5303 | 4.75E-04  | 0.00 |
| 213 | 3285.4446 | -6.85E-05 | 0.00 |

**Table S6.** Vibrational frequencies ( $\omega_i/\text{cm}^{-1}$ ) at the respective optimized  $S_0$  states, Shift vector  $K_i$  (a.u.) and Huang-Rhys factor  $S_i$  of complex **2**

|    | $\omega_i/\text{cm}^{-1}$ | $K_i$ (a.u.) | $S_i$ |
|----|---------------------------|--------------|-------|
| 1  | 13.8489                   | -7.81E+01    | 0.19  |
| 2  | 20.8243                   | -1.76E+01    | 0.01  |
| 3  | 29.7386                   | -2.21E+02    | 3.33  |
| 4  | 34.9725                   | 3.97E+01     | 0.13  |
| 5  | 36.1076                   | 1.68E+01     | 0.02  |
| 6  | 44.2145                   | -8.62E+01    | 0.75  |
| 7  | 45.4383                   | -4.17E+01    | 0.18  |
| 8  | 54.73                     | -6.99E+01    | 0.61  |
| 9  | 60.9164                   | -1.83E+01    | 0.05  |
| 10 | 62.7697                   | -1.74E+01    | 0.04  |
| 11 | 70.9722                   | -6.50E+00    | 0.01  |
| 12 | 81.384                    | 1.13E+01     | 0.02  |
| 13 | 95.7828                   | 3.71E+01     | 0.30  |
| 14 | 105.3507                  | -3.82E+01    | 0.35  |
| 15 | 117.3025                  | -3.45E+01    | 0.32  |
| 16 | 124.712                   | -3.67E+01    | 0.38  |
| 17 | 136.8842                  | 1.07E+01     | 0.04  |
| 18 | 138.0259                  | -4.11E+00    | 0.01  |
| 19 | 144.2533                  | -4.35E+00    | 0.01  |
| 20 | 152.4875                  | 8.18E+00     | 0.02  |
| 21 | 160.6195                  | 2.98E+01     | 0.33  |
| 22 | 164.4283                  | 2.78E+01     | 0.29  |
| 23 | 182.8459                  | -2.71E+00    | 0.00  |
| 24 | 187.7173                  | -1.82E+01    | 0.14  |
| 25 | 202.3346                  | -9.52E+00    | 0.04  |

|    |          |           |      |
|----|----------|-----------|------|
| 26 | 208.136  | -4.72E+00 | 0.01 |
| 27 | 218.1257 | -6.76E-01 | 0.00 |
| 28 | 229.1908 | 2.44E+01  | 0.31 |
| 29 | 236.7133 | 2.42E+01  | 0.32 |
| 30 | 250.7893 | -4.87E+00 | 0.01 |
| 31 | 268.0486 | -1.08E+01 | 0.07 |
| 32 | 277.6307 | 1.05E+01  | 0.07 |
| 33 | 281.3498 | 1.54E+00  | 0.00 |
| 34 | 286.8161 | 6.71E+00  | 0.03 |
| 35 | 302.9804 | -1.19E+01 | 0.10 |
| 36 | 308.0735 | -3.09E+00 | 0.01 |
| 37 | 322.9529 | -9.20E+00 | 0.06 |
| 38 | 343.4681 | 4.01E+00  | 0.01 |
| 39 | 365.3081 | -9.98E-01 | 0.00 |
| 40 | 391.2609 | -6.60E+00 | 0.04 |
| 41 | 398.295  | 3.37E-01  | 0.00 |
| 42 | 412.8935 | 2.77E-01  | 0.00 |
| 43 | 417.81   | 3.76E-01  | 0.00 |
| 44 | 419.5192 | 2.01E+00  | 0.00 |
| 45 | 443.8572 | 3.58E-01  | 0.00 |
| 46 | 453.0928 | 1.69E+00  | 0.00 |
| 47 | 453.9277 | -1.34E+00 | 0.00 |
| 48 | 465.4789 | -1.95E+00 | 0.00 |
| 49 | 469.0447 | -2.66E-01 | 0.00 |
| 50 | 476.9353 | -4.49E+00 | 0.02 |
| 51 | 480.6001 | -1.36E+00 | 0.00 |
| 52 | 483.21   | -9.28E-01 | 0.00 |
| 53 | 493.0847 | -2.70E+00 | 0.01 |
| 54 | 499.2742 | 4.47E+00  | 0.02 |
| 55 | 503.2696 | 3.72E+00  | 0.02 |
| 56 | 514.4664 | 3.93E-01  | 0.00 |
| 57 | 529.3858 | -1.72E+00 | 0.00 |
| 58 | 543.9143 | -2.43E+00 | 0.01 |
| 59 | 550.1239 | 1.26E-01  | 0.00 |
| 60 | 555.2146 | 1.21E+00  | 0.00 |
| 61 | 574.0587 | 5.59E-03  | 0.00 |
| 62 | 588.615  | 6.95E-01  | 0.00 |
| 63 | 589.3799 | -2.62E+00 | 0.01 |
| 64 | 599.7656 | 1.14E+00  | 0.00 |
| 65 | 605.414  | 2.64E-01  | 0.00 |
| 66 | 607.6331 | -2.71E-01 | 0.00 |
| 67 | 611.7628 | 2.20E+00  | 0.01 |
| 68 | 625.4479 | 1.31E+00  | 0.00 |
| 69 | 627.1044 | -2.13E-01 | 0.00 |
| 70 | 627.3983 | 1.02E-02  | 0.00 |
| 71 | 636.9664 | 2.24E+00  | 0.01 |
| 72 | 638.0552 | -1.99E+00 | 0.01 |
| 73 | 640.5265 | -1.96E+00 | 0.01 |
| 74 | 653.9023 | -1.10E-01 | 0.00 |
| 75 | 654.2578 | -5.86E-01 | 0.00 |
| 76 | 667.6155 | -7.47E-01 | 0.00 |

|     |          |           |      |
|-----|----------|-----------|------|
| 77  | 668.9455 | -9.24E-01 | 0.00 |
| 78  | 673.6951 | -1.07E+01 | 0.18 |
| 79  | 696.5342 | 2.66E+00  | 0.01 |
| 80  | 697.5532 | 9.25E-01  | 0.00 |
| 81  | 698.5298 | 8.41E-01  | 0.00 |
| 82  | 701.4015 | -3.20E-01 | 0.00 |
| 83  | 704.4877 | -1.41E+00 | 0.00 |
| 84  | 714.7916 | 5.54E-02  | 0.00 |
| 85  | 716.296  | -1.01E-01 | 0.00 |
| 86  | 720.4428 | -2.99E+00 | 0.01 |
| 87  | 726.7967 | 4.42E+00  | 0.03 |
| 88  | 730.8011 | -2.07E-01 | 0.00 |
| 89  | 741.3661 | -3.01E+00 | 0.02 |
| 90  | 743.1422 | 2.94E+00  | 0.01 |
| 91  | 748.0699 | 2.72E+00  | 0.01 |
| 92  | 749.8379 | 8.65E-01  | 0.00 |
| 93  | 754.5548 | -4.94E-01 | 0.00 |
| 94  | 757.3561 | 9.91E-01  | 0.00 |
| 95  | 758.4468 | 5.15E-01  | 0.00 |
| 96  | 766.9776 | 5.55E-01  | 0.00 |
| 97  | 768.9658 | -8.02E-01 | 0.00 |
| 98  | 771.134  | -1.48E-02 | 0.00 |
| 99  | 772.9042 | -6.04E-01 | 0.00 |
| 100 | 776.5362 | -1.13E+00 | 0.00 |
| 101 | 778.7075 | -2.43E+00 | 0.01 |
| 102 | 779.5704 | -1.03E+00 | 0.00 |
| 103 | 780.9016 | 1.14E-01  | 0.00 |
| 104 | 787.6515 | -3.82E-01 | 0.00 |
| 105 | 789.7314 | -5.60E-01 | 0.00 |
| 106 | 793.1502 | -1.36E+00 | 0.00 |
| 107 | 799.4049 | 1.96E-01  | 0.00 |
| 108 | 799.9867 | -1.36E+00 | 0.00 |
| 109 | 803.6651 | 7.27E-01  | 0.00 |
| 110 | 811.2449 | 5.45E-02  | 0.00 |
| 111 | 812.1827 | -2.29E+00 | 0.01 |
| 112 | 825.7196 | -3.53E+00 | 0.02 |
| 113 | 831.7348 | 3.31E-01  | 0.00 |
| 114 | 836.1221 | 2.04E-01  | 0.00 |
| 115 | 842.8637 | 1.65E-01  | 0.00 |
| 116 | 849.6616 | 9.89E-01  | 0.00 |
| 117 | 850.6872 | 1.13E-02  | 0.00 |
| 118 | 863.956  | 1.73E-02  | 0.00 |
| 119 | 880.4744 | -1.58E-01 | 0.00 |
| 120 | 896.1542 | -3.95E-01 | 0.00 |
| 121 | 902.6749 | -9.65E-01 | 0.00 |
| 122 | 912.6673 | -1.28E-01 | 0.00 |
| 123 | 913.2878 | 8.27E-02  | 0.00 |
| 124 | 915.9545 | 1.00E-01  | 0.00 |
| 125 | 918.8811 | -2.98E-01 | 0.00 |
| 126 | 927.0092 | -1.16E+00 | 0.00 |
| 127 | 931.0814 | 1.52E-01  | 0.00 |

|     |          |           |      |
|-----|----------|-----------|------|
| 128 | 934.4459 | 5.80E-02  | 0.00 |
| 129 | 942.4388 | -1.96E-01 | 0.00 |
| 130 | 943.4848 | 8.31E-02  | 0.00 |
| 131 | 947.3732 | 1.56E-01  | 0.00 |
| 132 | 948.2727 | -7.20E-01 | 0.00 |
| 133 | 951.2645 | -1.12E-01 | 0.00 |
| 134 | 953.858  | 1.27E+00  | 0.00 |
| 135 | 956.431  | 5.10E-02  | 0.00 |
| 136 | 957.4307 | 2.11E-01  | 0.00 |
| 137 | 961.09   | 3.02E-01  | 0.00 |
| 138 | 961.6112 | -2.47E-01 | 0.00 |
| 139 | 963.6877 | -5.12E-01 | 0.00 |
| 140 | 965.7679 | -2.91E-01 | 0.00 |
| 141 | 967.8391 | -2.81E-01 | 0.00 |
| 142 | 971.6561 | -4.96E-01 | 0.00 |
| 143 | 973.3248 | -7.14E-01 | 0.00 |
| 144 | 973.8876 | 1.94E-01  | 0.00 |
| 145 | 975.2642 | -3.94E+00 | 0.03 |
| 146 | 978.6299 | -6.75E+00 | 0.10 |
| 147 | 979.0691 | -2.01E+00 | 0.01 |
| 148 | 983.1412 | -1.94E+00 | 0.01 |
| 149 | 987.6365 | -1.76E+00 | 0.01 |
| 150 | 990.0627 | 5.76E-01  | 0.00 |
| 151 | 993.6257 | -6.55E-01 | 0.00 |
| 152 | 1002.724 | -3.97E-01 | 0.00 |
| 153 | 1003.486 | 6.25E-02  | 0.00 |
| 154 | 1006.159 | 5.81E-01  | 0.00 |
| 155 | 1010.386 | -1.10E+00 | 0.00 |
| 156 | 1016.489 | 4.49E-01  | 0.00 |
| 157 | 1019.733 | -1.81E-02 | 0.00 |
| 158 | 1020.24  | -4.30E+00 | 0.04 |
| 159 | 1030.603 | 4.12E-01  | 0.00 |
| 160 | 1035.531 | 1.10E+00  | 0.00 |
| 161 | 1039.511 | 5.55E+00  | 0.07 |
| 162 | 1042.037 | -5.32E-01 | 0.00 |
| 163 | 1043.468 | 2.81E+00  | 0.02 |
| 164 | 1055.177 | 1.59E+00  | 0.01 |
| 165 | 1060.471 | 5.79E-02  | 0.00 |
| 166 | 1063.256 | -3.01E+00 | 0.02 |
| 167 | 1065.787 | 5.98E-01  | 0.00 |
| 168 | 1070.696 | -8.81E-01 | 0.00 |
| 169 | 1079.199 | 1.49E+00  | 0.01 |
| 170 | 1085.197 | -7.61E-01 | 0.00 |
| 171 | 1091.542 | -1.41E+00 | 0.00 |
| 172 | 1097.157 | 4.80E-01  | 0.00 |
| 173 | 1106.116 | -1.07E+00 | 0.00 |
| 174 | 1117.123 | -9.18E-02 | 0.00 |
| 175 | 1121.477 | 2.99E-01  | 0.00 |
| 176 | 1125.416 | 9.73E-02  | 0.00 |
| 177 | 1143.541 | -8.24E-01 | 0.00 |
| 178 | 1149.951 | -2.60E+00 | 0.02 |

|     |          |           |      |
|-----|----------|-----------|------|
| 179 | 1155.192 | 1.46E+00  | 0.01 |
| 180 | 1167.349 | 5.68E-02  | 0.00 |
| 181 | 1184.058 | -5.96E-01 | 0.00 |
| 182 | 1187.184 | -1.87E+00 | 0.01 |
| 183 | 1193.573 | -1.62E+00 | 0.01 |
| 184 | 1193.878 | 8.38E-02  | 0.00 |
| 185 | 1195.63  | -1.44E-02 | 0.00 |
| 186 | 1197.53  | -8.63E-01 | 0.00 |
| 187 | 1217.928 | -1.15E+00 | 0.00 |
| 188 | 1218.94  | 7.50E-02  | 0.00 |
| 189 | 1222.151 | 3.70E-01  | 0.00 |
| 190 | 1285.168 | 3.20E+00  | 0.03 |
| 191 | 1290.097 | 1.58E+00  | 0.01 |
| 192 | 1311.139 | -1.33E-01 | 0.00 |
| 193 | 1321.313 | 7.55E-01  | 0.00 |
| 194 | 1332.325 | -8.02E-02 | 0.00 |
| 195 | 1334.508 | -1.98E+00 | 0.01 |
| 196 | 1334.893 | 2.16E+00  | 0.01 |
| 197 | 1342.03  | -2.00E+00 | 0.01 |
| 198 | 1342.492 | 6.25E-02  | 0.00 |
| 199 | 1344.843 | 2.85E-01  | 0.00 |
| 200 | 1351.647 | 5.23E-01  | 0.00 |
| 201 | 1356.296 | 7.58E-02  | 0.00 |
| 202 | 1363.555 | -1.58E+00 | 0.01 |
| 203 | 1371.915 | 2.00E+00  | 0.01 |
| 204 | 1379.537 | 1.96E+00  | 0.01 |
| 205 | 1386.093 | 4.90E+00  | 0.08 |
| 206 | 1390.202 | -1.06E+00 | 0.00 |
| 207 | 1413.905 | 4.25E+00  | 0.06 |
| 208 | 1419.192 | -4.05E+00 | 0.05 |
| 209 | 1440.687 | 3.39E+00  | 0.04 |
| 210 | 1464.379 | 2.45E+00  | 0.02 |
| 211 | 1479.281 | 9.66E-01  | 0.00 |
| 212 | 1485.807 | -8.17E-01 | 0.00 |
| 213 | 1488.901 | -5.00E-02 | 0.00 |
| 214 | 1492.576 | 2.00E+00  | 0.01 |
| 215 | 1503.839 | -4.47E-02 | 0.00 |
| 216 | 1504.866 | -6.33E-01 | 0.00 |
| 217 | 1517.813 | -6.99E-01 | 0.00 |
| 218 | 1531.973 | 1.06E-01  | 0.00 |
| 219 | 1533.615 | 5.41E-01  | 0.00 |
| 220 | 1539.786 | -9.56E-01 | 0.00 |
| 221 | 1545.538 | 1.56E+00  | 0.01 |
| 222 | 1558.172 | -7.04E-01 | 0.00 |
| 223 | 1570.493 | -4.55E-01 | 0.00 |
| 224 | 1614.088 | 3.69E+00  | 0.05 |
| 225 | 1619.323 | -1.06E+00 | 0.00 |
| 226 | 1628.983 | 1.85E-03  | 0.00 |
| 227 | 1636.888 | 5.20E+00  | 0.10 |
| 228 | 1643.806 | -4.57E-01 | 0.00 |
| 229 | 1649.936 | 2.55E+00  | 0.02 |

|     |          |           |      |
|-----|----------|-----------|------|
| 230 | 1661.378 | 1.05E+00  | 0.00 |
| 231 | 1661.615 | 1.54E-01  | 0.00 |
| 232 | 1669.48  | -1.50E+00 | 0.01 |
| 233 | 1684.994 | 1.02E+00  | 0.00 |
| 234 | 1689.011 | 3.51E-01  | 0.00 |
| 235 | 1691.556 | -4.76E-01 | 0.00 |
| 236 | 2684.822 | 1.87E-01  | 0.00 |
| 237 | 2687.175 | 4.75E-02  | 0.00 |
| 238 | 2687.768 | -2.88E-02 | 0.00 |
| 239 | 2691.537 | -6.27E-02 | 0.00 |
| 240 | 2697.388 | -3.48E-02 | 0.00 |
| 241 | 2698.997 | -5.43E-02 | 0.00 |
| 242 | 2708.1   | -1.43E-01 | 0.00 |
| 243 | 2716.645 | 3.28E-01  | 0.00 |
| 244 | 2745.871 | 3.16E-02  | 0.00 |
| 245 | 2772.383 | 2.39E-01  | 0.00 |
| 246 | 3207.287 | 1.73E-01  | 0.00 |
| 247 | 3207.778 | 6.72E-03  | 0.00 |
| 248 | 3209.474 | -1.10E-01 | 0.00 |
| 249 | 3212.32  | -6.07E-02 | 0.00 |
| 250 | 3213.662 | 1.14E-02  | 0.00 |
| 251 | 3215.437 | 1.29E-01  | 0.00 |
| 252 | 3222.801 | -1.29E-03 | 0.00 |
| 253 | 3227.453 | 1.85E-01  | 0.00 |
| 254 | 3229.18  | 2.70E-02  | 0.00 |
| 255 | 3229.289 | 1.32E-01  | 0.00 |
| 256 | 3231.03  | -1.19E-02 | 0.00 |
| 257 | 3232.092 | -1.17E-01 | 0.00 |
| 258 | 3232.984 | 2.70E-01  | 0.00 |
| 259 | 3234.187 | -2.57E-01 | 0.00 |
| 260 | 3236.724 | -6.00E-03 | 0.00 |
| 261 | 3238.442 | -1.52E-01 | 0.00 |
| 262 | 3239.439 | -3.72E-01 | 0.00 |
| 263 | 3241.054 | -7.12E-03 | 0.00 |
| 264 | 3242.661 | -8.53E-05 | 0.00 |
| 265 | 3245.364 | -6.56E-02 | 0.00 |
| 266 | 3251.235 | -9.54E-02 | 0.00 |
| 267 | 3253.78  | 1.36E-02  | 0.00 |
| 268 | 3257.583 | 3.56E-02  | 0.00 |
| 269 | 3258.968 | -3.20E-02 | 0.00 |
| 270 | 3261.433 | 2.22E-01  | 0.00 |
| 271 | 3268.138 | -1.62E-01 | 0.00 |
| 272 | 3279.744 | -1.21E-02 | 0.00 |
| 273 | 3290.342 | -1.88E-01 | 0.00 |

**Table S7.** Vibrational frequencies ( $\omega_i/\text{cm}^{-1}$ ) at the respective optimized  $S_0$  states, Shift vector  $K_i$  (a.u.) and Huang-Rhys factor  $S_i$  of complex **3**

|   | $\omega_i/\text{cm}^{-1}$ | $K_i$ (a.u.) | $S_i$ |
|---|---------------------------|--------------|-------|
| 1 | 30.1002                   | -5.86E+01    | 0.00  |
| 2 | 36.2584                   | 7.33E+00     | 0.24  |

|    |          |           |      |
|----|----------|-----------|------|
| 3  | 41.4948  | 2.55E+01  | 0.00 |
| 4  | 45.5458  | -2.10E+01 | 0.06 |
| 5  | 52.4515  | -4.24E+01 | 0.05 |
| 6  | 74.1741  | -2.45E+01 | 0.22 |
| 7  | 87.4733  | 5.30E+00  | 0.10 |
| 8  | 96.3995  | -4.84E+00 | 0.01 |
| 9  | 104.9912 | -1.07E+01 | 0.01 |
| 10 | 127.7376 | -8.38E+00 | 0.03 |
| 11 | 143.8101 | -7.12E+00 | 0.02 |
| 12 | 153.4755 | 7.95E+00  | 0.02 |
| 13 | 161.7129 | 4.55E+00  | 0.02 |
| 14 | 174.52   | 3.83E+00  | 0.01 |
| 15 | 183.4935 | -5.40E+00 | 0.01 |
| 16 | 190.0341 | -8.89E-01 | 0.01 |
| 17 | 197.8738 | 6.52E+00  | 0.00 |
| 18 | 206.4985 | 1.23E+00  | 0.02 |
| 19 | 212.6815 | 8.59E+00  | 0.00 |
| 20 | 214.4511 | 7.83E+00  | 0.04 |
| 21 | 244.9653 | 1.52E+01  | 0.03 |
| 22 | 253.2294 | 1.57E+01  | 0.13 |
| 23 | 258.8675 | 1.73E+01  | 0.14 |
| 24 | 271.2656 | -1.89E+01 | 0.18 |
| 25 | 281.7813 | 9.91E+00  | 0.22 |
| 26 | 286.7851 | 3.48E+00  | 0.06 |
| 27 | 299.1637 | -1.70E+00 | 0.01 |
| 28 | 306.7217 | -4.47E+00 | 0.00 |
| 29 | 335.8238 | -1.82E+00 | 0.01 |
| 30 | 348.6789 | 2.96E+00  | 0.00 |
| 31 | 366.7516 | 2.19E+00  | 0.01 |
| 32 | 395.3815 | -1.22E+00 | 0.00 |
| 33 | 435.2809 | -1.61E+01 | 0.00 |
| 34 | 442.8808 | -7.39E+00 | 0.26 |
| 35 | 447.3321 | -5.14E-01 | 0.06 |
| 36 | 455.3022 | 1.45E+00  | 0.00 |
| 37 | 465.0325 | 1.21E-01  | 0.00 |
| 38 | 482.1385 | 1.07E-01  | 0.00 |
| 39 | 489.4559 | 1.24E+00  | 0.00 |
| 40 | 493.5277 | 3.27E+00  | 0.00 |
| 41 | 497.1419 | 3.86E+00  | 0.01 |
| 42 | 503.717  | 7.66E-01  | 0.02 |
| 43 | 514.6803 | -5.09E-01 | 0.00 |
| 44 | 516.4644 | 4.38E-01  | 0.00 |
| 45 | 518.8382 | -9.09E-02 | 0.00 |
| 46 | 525.0467 | 8.46E-01  | 0.00 |
| 47 | 543.02   | 3.14E+00  | 0.00 |
| 48 | 548.5369 | 8.22E-02  | 0.01 |
| 49 | 550.9286 | -1.20E+00 | 0.00 |
| 50 | 562.1133 | -2.72E+00 | 0.00 |
| 51 | 570.2107 | -2.05E+00 | 0.01 |
| 52 | 584.512  | -4.35E-01 | 0.01 |
| 53 | 589.0184 | -1.64E+00 | 0.00 |

|     |          |           |      |
|-----|----------|-----------|------|
| 54  | 590.1832 | -1.91E-01 | 0.00 |
| 55  | 598.7448 | -3.51E-01 | 0.00 |
| 56  | 602.8407 | -5.69E-01 | 0.00 |
| 57  | 605.295  | -7.38E-01 | 0.00 |
| 58  | 606.8913 | -6.07E-01 | 0.00 |
| 59  | 626.3652 | 5.03E-01  | 0.00 |
| 60  | 638.0432 | 3.63E-01  | 0.00 |
| 61  | 644.2835 | -1.06E+00 | 0.00 |
| 62  | 655.9726 | 2.64E-02  | 0.00 |
| 63  | 660.3366 | -2.59E+00 | 0.00 |
| 64  | 663.821  | 1.28E-01  | 0.01 |
| 65  | 666.3418 | 2.65E-01  | 0.00 |
| 66  | 677.1809 | 8.83E-01  | 0.00 |
| 67  | 700.0581 | -6.69E-01 | 0.00 |
| 68  | 702.3025 | 9.32E-02  | 0.00 |
| 69  | 706.5904 | 4.93E-01  | 0.00 |
| 70  | 714.5558 | 8.94E-01  | 0.00 |
| 71  | 717.9609 | -5.13E+00 | 0.00 |
| 72  | 727.6159 | -2.87E-01 | 0.04 |
| 73  | 735.8004 | 1.78E-01  | 0.00 |
| 74  | 740.6407 | -1.75E-01 | 0.00 |
| 75  | 746.1767 | -1.76E-01 | 0.00 |
| 76  | 746.9336 | 5.47E-01  | 0.00 |
| 77  | 749.8342 | -3.54E-01 | 0.00 |
| 78  | 751.299  | -1.14E-01 | 0.00 |
| 79  | 753.0215 | 4.95E-01  | 0.00 |
| 80  | 758.3811 | -3.39E-01 | 0.00 |
| 81  | 766.4339 | 2.78E-01  | 0.00 |
| 82  | 766.8786 | -1.28E+00 | 0.00 |
| 83  | 768.5431 | -2.10E-01 | 0.00 |
| 84  | 771.547  | -3.94E-01 | 0.00 |
| 85  | 773.0682 | 4.23E-01  | 0.00 |
| 86  | 776.0176 | -5.20E-01 | 0.00 |
| 87  | 777.7716 | 2.01E-01  | 0.00 |
| 88  | 781.6747 | -5.26E-01 | 0.00 |
| 89  | 788.5083 | 4.62E-02  | 0.00 |
| 90  | 791.9787 | 1.31E-01  | 0.00 |
| 91  | 798.3168 | -2.80E-01 | 0.00 |
| 92  | 803.5347 | -2.11E-01 | 0.00 |
| 93  | 805.4633 | -4.46E-01 | 0.00 |
| 94  | 807.1426 | -4.66E-01 | 0.00 |
| 95  | 814.3566 | 1.07E-01  | 0.00 |
| 96  | 827.5355 | 2.92E-01  | 0.00 |
| 97  | 841.4884 | -3.15E-01 | 0.00 |
| 98  | 855.0132 | -7.47E-03 | 0.00 |
| 99  | 859.3246 | -2.92E-01 | 0.00 |
| 100 | 861.641  | 4.57E-01  | 0.00 |
| 101 | 869.592  | 5.09E-01  | 0.00 |
| 102 | 876.0927 | -2.93E-01 | 0.00 |
| 103 | 881.8697 | -3.03E-01 | 0.00 |
| 104 | 890.1105 | -1.09E+00 | 0.00 |



|     |          |           |      |
|-----|----------|-----------|------|
| 105 | 895.672  | -1.10E+00 | 0.00 |
| 106 | 911.3791 | -3.17E-02 | 0.00 |
| 107 | 916.3806 | 1.48E-02  | 0.00 |
| 108 | 918.3592 | 1.22E-01  | 0.00 |
| 109 | 929.448  | -4.38E-01 | 0.00 |
| 110 | 930.7364 | 6.82E-02  | 0.00 |
| 111 | 933.0806 | -5.55E-02 | 0.00 |
| 112 | 937.6733 | -6.55E-02 | 0.00 |
| 113 | 940.5592 | -4.45E-02 | 0.00 |
| 114 | 945.268  | 1.06E-01  | 0.00 |
| 115 | 946.622  | 5.95E-01  | 0.00 |
| 116 | 948.5805 | -9.04E-02 | 0.00 |
| 117 | 950.8951 | 2.77E-01  | 0.00 |
| 118 | 952.7241 | -3.66E-02 | 0.00 |
| 119 | 955.237  | 7.23E-02  | 0.00 |
| 120 | 955.9621 | 2.76E-02  | 0.00 |
| 121 | 958.9551 | -2.37E+00 | 0.00 |
| 122 | 962.8052 | -1.85E-01 | 0.01 |
| 123 | 965.6924 | 1.40E-01  | 0.00 |
| 124 | 969.2478 | -1.39E-01 | 0.00 |
| 125 | 970.89   | 5.76E-01  | 0.00 |
| 126 | 977.1063 | 2.16E-02  | 0.00 |
| 127 | 979.8789 | -2.80E-01 | 0.00 |
| 128 | 981.2736 | -2.49E-01 | 0.00 |
| 129 | 986.9871 | -3.98E-01 | 0.00 |
| 130 | 991.4181 | -1.80E-02 | 0.00 |
| 131 | 994.0298 | 2.28E-01  | 0.00 |
| 132 | 997.6245 | 1.27E+00  | 0.00 |
| 133 | 1006.325 | -2.73E-02 | 0.00 |
| 134 | 1012.276 | -1.64E-01 | 0.00 |
| 135 | 1019.717 | 3.67E-02  | 0.00 |
| 136 | 1036.325 | 2.87E-01  | 0.00 |
| 137 | 1041.623 | 1.36E+00  | 0.00 |
| 138 | 1045.927 | -5.68E-01 | 0.00 |
| 139 | 1054.077 | -4.02E+00 | 0.00 |
| 140 | 1065.572 | 2.63E-01  | 0.04 |
| 141 | 1078.166 | 9.11E-01  | 0.00 |
| 142 | 1092.06  | 1.06E-01  | 0.00 |
| 143 | 1099.467 | 5.82E-01  | 0.00 |
| 144 | 1104.568 | 5.80E+00  | 0.00 |
| 145 | 1117.222 | -2.76E-01 | 0.08 |
| 146 | 1119.351 | -6.13E-01 | 0.00 |
| 147 | 1120.237 | -1.52E+00 | 0.00 |
| 148 | 1124.639 | 1.56E+00  | 0.01 |
| 149 | 1140.421 | -3.28E+00 | 0.01 |
| 150 | 1146.622 | 3.66E+00  | 0.03 |
| 151 | 1151.386 | -2.47E-01 | 0.04 |
| 152 | 1178.537 | -1.79E-01 | 0.00 |
| 153 | 1187.668 | 2.25E-01  | 0.00 |
| 154 | 1195.444 | -6.46E-03 | 0.00 |
| 155 | 1205.733 | 2.30E+00  | 0.00 |

|     |          |           |      |
|-----|----------|-----------|------|
| 156 | 1211.62  | -2.19E+00 | 0.01 |
| 157 | 1230.144 | -2.85E+00 | 0.01 |
| 158 | 1237.309 | -3.16E+00 | 0.02 |
| 159 | 1241.912 | -2.14E+00 | 0.03 |
| 160 | 1257.089 | 1.23E-01  | 0.01 |
| 161 | 1264.236 | 9.85E-02  | 0.00 |
| 162 | 1280.057 | 2.33E-02  | 0.00 |
| 163 | 1334.57  | -3.22E-01 | 0.00 |
| 164 | 1343.5   | 6.85E-01  | 0.00 |
| 165 | 1345.467 | 1.53E+00  | 0.00 |
| 166 | 1346.934 | 1.93E+00  | 0.01 |
| 167 | 1355.716 | 3.35E+00  | 0.01 |
| 168 | 1369.101 | -6.51E-01 | 0.03 |
| 169 | 1373.536 | -5.69E+00 | 0.00 |
| 170 | 1376.174 | 1.01E+01  | 0.10 |
| 171 | 1411.856 | 1.11E-02  | 0.32 |
| 172 | 1427.883 | 2.86E+00  | 0.00 |
| 173 | 1447.359 | -1.55E+00 | 0.03 |
| 174 | 1456.045 | -5.79E-02 | 0.01 |
| 175 | 1464.461 | -1.30E-01 | 0.00 |
| 176 | 1468.529 | -4.61E+00 | 0.00 |
| 177 | 1481.675 | -8.46E-02 | 0.07 |
| 178 | 1488.352 | -4.46E+00 | 0.00 |
| 179 | 1490.865 | 5.16E-01  | 0.07 |
| 180 | 1502.78  | -2.33E+00 | 0.00 |
| 181 | 1509.011 | -9.66E-02 | 0.02 |
| 182 | 1517.21  | 2.90E+00  | 0.00 |
| 183 | 1535.763 | -3.62E-03 | 0.03 |
| 184 | 1546.425 | -4.86E+00 | 0.00 |
| 185 | 1553.662 | 5.05E-01  | 0.08 |
| 186 | 1557.808 | -2.47E-01 | 0.00 |
| 187 | 1570.156 | 1.29E-01  | 0.00 |
| 188 | 1577.604 | 1.52E-01  | 0.00 |
| 189 | 1621.358 | 8.55E+00  | 0.00 |
| 190 | 1642.494 | 3.58E-01  | 0.27 |
| 191 | 1651.545 | 3.52E-01  | 0.00 |
| 192 | 1654.226 | 4.26E-01  | 0.00 |
| 193 | 1674.052 | 1.22E-01  | 0.00 |
| 194 | 1687.244 | 5.53E-02  | 0.00 |
| 195 | 1699.179 | 2.34E-01  | 0.00 |
| 196 | 2684.025 | 2.31E-02  | 0.00 |
| 197 | 2686.79  | -1.24E-03 | 0.00 |
| 198 | 2687.893 | 1.12E-02  | 0.00 |
| 199 | 2693.682 | -2.40E-02 | 0.00 |
| 200 | 2698.316 | -8.73E-03 | 0.00 |
| 201 | 2699.899 | -1.97E-02 | 0.00 |
| 202 | 2708.959 | 2.75E-02  | 0.00 |
| 203 | 2721.854 | -5.40E-02 | 0.00 |
| 204 | 2736.04  | 1.20E-02  | 0.00 |
| 205 | 2779.542 | -8.43E-02 | 0.00 |
| 206 | 3203.71  | -8.58E-03 | 0.00 |

|     |          |           |      |
|-----|----------|-----------|------|
| 207 | 3208.366 | 9.06E-03  | 0.00 |
| 208 | 3209.688 | 5.30E-02  | 0.00 |
| 209 | 3211.999 | 4.73E-02  | 0.00 |
| 210 | 3221.192 | 3.84E-02  | 0.00 |
| 211 | 3221.736 | 9.48E-03  | 0.00 |
| 212 | 3224.338 | -2.34E-01 | 0.00 |
| 213 | 3226.7   | 2.58E-02  | 0.00 |
| 214 | 3227.482 | -9.62E-03 | 0.00 |
| 215 | 3228.915 | -5.02E-02 | 0.00 |
| 216 | 3234.619 | -5.60E-02 | 0.00 |
| 217 | 3234.926 | 7.35E-03  | 0.00 |
| 218 | 3240.847 | -1.25E-01 | 0.00 |
| 219 | 3250.65  | 1.45E-01  | 0.00 |
| 220 | 3251.798 | 1.16E-02  | 0.00 |
| 221 | 3253.39  | 6.55E-04  | 0.00 |
| 222 | 3265.714 | -2.56E-02 | 0.00 |
| 223 | 3267.87  | 2.10E-02  | 0.00 |
| 224 | 3287.668 | 1.41E-01  | 0.00 |
| 225 | 3300.785 | -1.60E-02 | 0.00 |

**Table S8.** Vibrational frequencies ( $\omega_i/\text{cm}^{-1}$ ) at the respective optimized  $S_0$  states, Shift vector  $K_i$  (a.u.) and Huang-Rhys factor  $S_i$  of complex **3a**

|    | $\omega_i/\text{cm}^{-1}$ | $K_i$ (a.u.) | $S_i$ |
|----|---------------------------|--------------|-------|
| 1  | 295.0107                  | -2.45E+01    | 1.16  |
| 2  | 67.4739                   | -4.42E+01    | 0.78  |
| 3  | 241.5628                  | -1.70E+01    | 0.44  |
| 4  | 286.7812                  | -1.46E+01    | 0.40  |
| 5  | 148.608                   | 1.99E+01     | 0.30  |
| 6  | 221.7475                  | 1.54E+01     | 0.16  |
| 7  | 410.169                   | -1.13E+01    | 0.14  |
| 8  | 1069.599                  | -6.72E+00    | 0.13  |
| 9  | 66.7275                   | -2.56E+01    | 0.12  |
| 10 | 96.8396                   | -2.10E+01    | 0.12  |
| 11 | 195.7654                  | -1.44E+01    | 0.11  |
| 12 | 300.9421                  | -1.05E+01    | 0.10  |
| 13 | 303.5613                  | -1.01E+01    | 0.10  |
| 14 | 99.8193                   | -1.61E+01    | 0.09  |
| 15 | 63.693                    | -1.97E+01    | 0.08  |
| 16 | 932.9171                  | -5.02E+00    | 0.07  |
| 17 | 1135.695                  | -4.53E+00    | 0.06  |
| 18 | 121.2483                  | 1.36E+01     | 0.06  |
| 19 | 32.6977                   | -2.57E+01    | 0.05  |
| 20 | 23.5918                   | -2.96E+01    | 0.05  |
| 21 | 87.2621                   | 1.53E+01     | 0.05  |
| 22 | 280.8298                  | 8.18E+00     | 0.05  |
| 23 | 1032.019                  | -4.22E+00    | 0.05  |
| 24 | 453.9388                  | -6.32E+00    | 0.05  |
| 25 | 187.7685                  | 9.71E+00     | 0.04  |
| 26 | 332.1383                  | -7.28E+00    | 0.04  |
| 27 | 134.2809                  | -1.10E+01    | 0.04  |

|    |          |           |      |
|----|----------|-----------|------|
| 28 | 231.2397 | -8.26E+00 | 0.04 |
| 29 | 678.2139 | -4.33E+00 | 0.04 |
| 30 | 927.4315 | 3.67E+00  | 0.04 |
| 31 | 276.2508 | -6.64E+00 | 0.04 |
| 32 | 924.0057 | 3.59E+00  | 0.03 |
| 33 | 499.6407 | -4.83E+00 | 0.03 |
| 34 | 1294.673 | 2.90E+00  | 0.03 |
| 35 | 595.7828 | -4.21E+00 | 0.03 |
| 36 | 1642.471 | 2.50E+00  | 0.03 |
| 37 | 446.9465 | 4.68E+00  | 0.02 |
| 38 | 322.4035 | 5.39E+00  | 0.02 |
| 39 | 636.876  | 3.82E+00  | 0.02 |
| 40 | 441.0479 | -4.51E+00 | 0.02 |
| 41 | 1660.108 | -2.30E+00 | 0.02 |
| 42 | 1546.882 | 2.35E+00  | 0.02 |
| 43 | 751.091  | 3.28E+00  | 0.02 |
| 44 | 1310.759 | 2.44E+00  | 0.02 |
| 45 | 548.8571 | -3.75E+00 | 0.02 |
| 46 | 439.1483 | -4.14E+00 | 0.02 |
| 47 | 365.9619 | 4.52E+00  | 0.02 |
| 48 | 642.1056 | -3.39E+00 | 0.02 |
| 49 | 1261.292 | 2.40E+00  | 0.02 |
| 50 | 748.471  | 3.07E+00  | 0.02 |
| 51 | 1387.571 | -2.25E+00 | 0.02 |
| 52 | 181.9246 | 6.15E+00  | 0.02 |
| 53 | 1413.53  | 2.21E+00  | 0.02 |
| 54 | 660.7224 | -3.19E+00 | 0.02 |
| 55 | 425.9961 | 3.55E+00  | 0.02 |
| 56 | 152.2284 | 5.93E+00  | 0.02 |
| 57 | 472.585  | -3.36E+00 | 0.02 |
| 58 | 1124.864 | 2.15E+00  | 0.01 |
| 59 | 1076.225 | 2.19E+00  | 0.01 |
| 60 | 637.8374 | 2.62E+00  | 0.01 |
| 61 | 1095.538 | -1.89E+00 | 0.01 |
| 62 | 1231.348 | 1.78E+00  | 0.01 |
| 63 | 1051.484 | -1.90E+00 | 0.01 |
| 64 | 1187.012 | 1.73E+00  | 0.01 |
| 65 | 444.4407 | 2.73E+00  | 0.01 |
| 66 | 1208.625 | -1.65E+00 | 0.01 |
| 67 | 745.596  | 2.09E+00  | 0.01 |
| 68 | 165.8938 | 4.27E+00  | 0.01 |
| 69 | 268.632  | 3.31E+00  | 0.01 |
| 70 | 496.0889 | 2.41E+00  | 0.01 |
| 71 | 1041.213 | -1.66E+00 | 0.01 |
| 72 | 596.9628 | 2.19E+00  | 0.01 |
| 73 | 1574.346 | 1.35E+00  | 0.01 |
| 74 | 1393.865 | -1.41E+00 | 0.01 |
| 75 | 125.9753 | -4.67E+00 | 0.01 |
| 76 | 1085.951 | -1.57E+00 | 0.01 |
| 77 | 759.8434 | 1.80E+00  | 0.01 |
| 78 | 811.4927 | -1.73E+00 | 0.01 |

|     |          |           |      |
|-----|----------|-----------|------|
| 79  | 735.2569 | -1.81E+00 | 0.01 |
| 80  | 942.5934 | 1.59E+00  | 0.01 |
| 81  | 432.2508 | -2.34E+00 | 0.01 |
| 82  | 1239.997 | -1.38E+00 | 0.01 |
| 83  | 614.5823 | 1.96E+00  | 0.01 |
| 84  | 941.5909 | 1.57E+00  | 0.01 |
| 85  | 1092.924 | -1.44E+00 | 0.01 |
| 86  | 606.8339 | -1.86E+00 | 0.01 |
| 87  | 1496.302 | 1.18E+00  | 0.01 |
| 88  | 40.6889  | -6.98E+00 | 0.01 |
| 89  | 603.0984 | 1.80E+00  | 0.00 |
| 90  | 203.0875 | 3.09E+00  | 0.00 |
| 91  | 1168.867 | -1.27E+00 | 0.00 |
| 92  | 320.795  | -2.36E+00 | 0.00 |
| 93  | 938.1488 | 1.36E+00  | 0.00 |
| 94  | 1483.784 | 1.06E+00  | 0.00 |
| 95  | 1344.279 | 1.07E+00  | 0.00 |
| 96  | 918.315  | 1.25E+00  | 0.00 |
| 97  | 806.3875 | -1.31E+00 | 0.00 |
| 98  | 951.2053 | 1.19E+00  | 0.00 |
| 99  | 906.3255 | 1.20E+00  | 0.00 |
| 100 | 622.2571 | -1.44E+00 | 0.00 |
| 101 | 1285.703 | -1.00E+00 | 0.00 |
| 102 | 774.3338 | -1.27E+00 | 0.00 |
| 103 | 590.0596 | -1.43E+00 | 0.00 |
| 104 | 1457.462 | 9.01E-01  | 0.00 |
| 105 | 1401.436 | 9.18E-01  | 0.00 |
| 106 | 1126.491 | 1.02E+00  | 0.00 |
| 107 | 1488.855 | -8.67E-01 | 0.00 |
| 108 | 871.2767 | -1.11E+00 | 0.00 |
| 109 | 1648.827 | 8.03E-01  | 0.00 |
| 110 | 1516.411 | -8.34E-01 | 0.00 |
| 111 | 1377.219 | -8.75E-01 | 0.00 |
| 112 | 943.8842 | 1.04E+00  | 0.00 |
| 113 | 1368.723 | -8.63E-01 | 0.00 |
| 114 | 1164.418 | -9.27E-01 | 0.00 |
| 115 | 829.1535 | 1.09E+00  | 0.00 |
| 116 | 1679.585 | -7.59E-01 | 0.00 |
| 117 | 456.4967 | -1.45E+00 | 0.00 |
| 118 | 746.9039 | -1.14E+00 | 0.00 |
| 119 | 1490.434 | 7.88E-01  | 0.00 |
| 120 | 669.7687 | 1.16E+00  | 0.00 |
| 121 | 1436.731 | 7.79E-01  | 0.00 |
| 122 | 630.0488 | -1.18E+00 | 0.00 |
| 123 | 1191.916 | 8.30E-01  | 0.00 |
| 124 | 557.2335 | 1.18E+00  | 0.00 |
| 125 | 699.401  | -1.01E+00 | 0.00 |
| 126 | 987.8197 | -8.48E-01 | 0.00 |
| 127 | 726.0166 | -9.82E-01 | 0.00 |
| 128 | 568.3009 | 1.09E+00  | 0.00 |
| 129 | 1032.316 | -7.90E-01 | 0.00 |

|     |          |           |      |
|-----|----------|-----------|------|
| 130 | 1651.003 | 6.23E-01  | 0.00 |
| 131 | 954.5128 | 8.14E-01  | 0.00 |
| 132 | 1140.691 | -7.44E-01 | 0.00 |
| 133 | 706.9553 | 9.34E-01  | 0.00 |
| 134 | 546.9114 | 1.06E+00  | 0.00 |
| 135 | 435.4251 | -1.19E+00 | 0.00 |
| 136 | 807.279  | -8.57E-01 | 0.00 |
| 137 | 948.3238 | 7.82E-01  | 0.00 |
| 138 | 483.5661 | 1.07E+00  | 0.00 |
| 139 | 752.9096 | -8.54E-01 | 0.00 |
| 140 | 740.331  | -8.12E-01 | 0.00 |
| 141 | 1132.084 | -6.54E-01 | 0.00 |
| 142 | 952.8112 | 7.00E-01  | 0.00 |
| 143 | 815.5404 | 7.43E-01  | 0.00 |
| 144 | 1155.852 | 6.11E-01  | 0.00 |
| 145 | 924.4235 | 6.81E-01  | 0.00 |
| 146 | 770.4145 | -7.37E-01 | 0.00 |
| 147 | 1479.024 | 5.25E-01  | 0.00 |
| 148 | 709.0307 | 7.46E-01  | 0.00 |
| 149 | 665.4083 | 7.59E-01  | 0.00 |
| 150 | 1035.869 | -5.91E-01 | 0.00 |
| 151 | 1556.549 | 4.81E-01  | 0.00 |
| 152 | 1018.654 | -5.92E-01 | 0.00 |
| 153 | 1609.271 | 4.69E-01  | 0.00 |
| 154 | 651.2449 | -6.55E-01 | 0.00 |
| 155 | 818.7376 | -5.74E-01 | 0.00 |
| 156 | 1407.579 | 4.21E-01  | 0.00 |
| 157 | 850.0842 | 5.31E-01  | 0.00 |
| 158 | 598.7719 | -6.26E-01 | 0.00 |
| 159 | 790.5067 | 5.40E-01  | 0.00 |
| 160 | 1304.184 | -4.03E-01 | 0.00 |
| 161 | 967.224  | -4.63E-01 | 0.00 |
| 162 | 797.4089 | -5.03E-01 | 0.00 |
| 163 | 481.2948 | 6.39E-01  | 0.00 |
| 164 | 1117.832 | 4.08E-01  | 0.00 |
| 165 | 1430.773 | 3.56E-01  | 0.00 |
| 166 | 1624.603 | 3.02E-01  | 0.00 |
| 167 | 1353.237 | -3.18E-01 | 0.00 |
| 168 | 864.4212 | -3.97E-01 | 0.00 |
| 169 | 937.1147 | -3.65E-01 | 0.00 |
| 170 | 757.7673 | 4.00E-01  | 0.00 |
| 171 | 3264.955 | -1.93E-01 | 0.00 |
| 172 | 1353.915 | 2.98E-01  | 0.00 |
| 173 | 1064.47  | 3.33E-01  | 0.00 |
| 174 | 826.1774 | -3.75E-01 | 0.00 |
| 175 | 1113.201 | -3.13E-01 | 0.00 |
| 176 | 1599.583 | -2.55E-01 | 0.00 |
| 177 | 625.855  | 4.01E-01  | 0.00 |
| 178 | 766.8797 | 3.58E-01  | 0.00 |
| 179 | 1541.131 | -2.50E-01 | 0.00 |
| 180 | 1200.981 | -2.82E-01 | 0.00 |

|     |          |           |      |
|-----|----------|-----------|------|
| 181 | 514.0225 | -4.27E-01 | 0.00 |
| 182 | 3226.423 | 1.69E-01  | 0.00 |
| 183 | 1151.449 | -2.81E-01 | 0.00 |
| 184 | 1690.993 | -2.27E-01 | 0.00 |
| 185 | 800.2405 | -3.23E-01 | 0.00 |
| 186 | 605.8693 | -3.71E-01 | 0.00 |
| 187 | 767.7459 | -3.17E-01 | 0.00 |
| 188 | 999.2151 | 2.77E-01  | 0.00 |
| 189 | 1001.688 | -2.76E-01 | 0.00 |
| 190 | 587.8721 | 3.51E-01  | 0.00 |
| 191 | 714.3064 | 3.16E-01  | 0.00 |
| 192 | 773.7202 | -2.81E-01 | 0.00 |
| 193 | 3224.803 | -1.35E-01 | 0.00 |
| 194 | 139.0875 | 6.25E-01  | 0.00 |
| 195 | 1333.584 | 1.97E-01  | 0.00 |
| 196 | 881.5884 | -2.38E-01 | 0.00 |
| 197 | 3246.97  | 1.21E-01  | 0.00 |
| 198 | 910.8383 | -2.27E-01 | 0.00 |
| 199 | 754.7852 | -2.40E-01 | 0.00 |
| 200 | 1678.229 | -1.56E-01 | 0.00 |
| 201 | 1533.35  | -1.62E-01 | 0.00 |
| 202 | 835.5969 | -2.16E-01 | 0.00 |
| 203 | 989.388  | 1.98E-01  | 0.00 |
| 204 | 3245.305 | -9.89E-02 | 0.00 |
| 205 | 1195.591 | 1.62E-01  | 0.00 |
| 206 | 980.6829 | 1.73E-01  | 0.00 |
| 207 | 3217.838 | 9.45E-02  | 0.00 |
| 208 | 3251.23  | 9.21E-02  | 0.00 |
| 209 | 1346.962 | 1.43E-01  | 0.00 |
| 210 | 1536.1   | -1.33E-01 | 0.00 |
| 211 | 1039.868 | 1.58E-01  | 0.00 |
| 212 | 839.4854 | 1.66E-01  | 0.00 |
| 213 | 3255.193 | 8.41E-02  | 0.00 |
| 214 | 1019.2   | -1.48E-01 | 0.00 |
| 215 | 3236.129 | 7.81E-02  | 0.00 |
| 216 | 965.6961 | -1.32E-01 | 0.00 |
| 217 | 2783.763 | -7.73E-02 | 0.00 |
| 218 | 3236.182 | 7.12E-02  | 0.00 |
| 219 | 961.8188 | -1.27E-01 | 0.00 |
| 220 | 1508.061 | -1.00E-01 | 0.00 |
| 221 | 857.7041 | 1.29E-01  | 0.00 |
| 222 | 762.3524 | -1.27E-01 | 0.00 |
| 223 | 980.9537 | -1.12E-01 | 0.00 |
| 224 | 2744.116 | 6.62E-02  | 0.00 |
| 225 | 974.7183 | 1.01E-01  | 0.00 |
| 226 | 990.5299 | -1.00E-01 | 0.00 |
| 227 | 581.3372 | 1.20E-01  | 0.00 |
| 228 | 3278.163 | 4.83E-02  | 0.00 |
| 229 | 955.8336 | -8.91E-02 | 0.00 |
| 230 | 2726.251 | -5.15E-02 | 0.00 |
| 231 | 3244.542 | 4.72E-02  | 0.00 |

|     |          |           |      |
|-----|----------|-----------|------|
| 232 | 3217.523 | 3.83E-02  | 0.00 |
| 233 | 789.7311 | 7.71E-02  | 0.00 |
| 234 | 951.761  | 6.69E-02  | 0.00 |
| 235 | 787.259  | 6.47E-02  | 0.00 |
| 236 | 1340.795 | -4.73E-02 | 0.00 |
| 237 | 3274.168 | -2.84E-02 | 0.00 |
| 238 | 3246.453 | -2.20E-02 | 0.00 |
| 239 | 2711.358 | 2.32E-02  | 0.00 |
| 240 | 3294.938 | 1.74E-02  | 0.00 |
| 241 | 3258.351 | 1.65E-02  | 0.00 |
| 242 | 2688.734 | -1.69E-02 | 0.00 |
| 243 | 2691.153 | -1.57E-02 | 0.00 |
| 244 | 3228.38  | -1.39E-02 | 0.00 |
| 245 | 913.8108 | -2.49E-02 | 0.00 |
| 246 | 3211.353 | 1.30E-02  | 0.00 |
| 247 | 2700.59  | 1.38E-02  | 0.00 |
| 248 | 3212.966 | -1.09E-02 | 0.00 |
| 249 | 976.3672 | 1.95E-02  | 0.00 |
| 250 | 3267.67  | 9.28E-03  | 0.00 |
| 251 | 3240.381 | 9.08E-03  | 0.00 |
| 252 | 2687.224 | -8.95E-03 | 0.00 |
| 253 | 1614.656 | 1.04E-02  | 0.00 |
| 254 | 2702.682 | -6.60E-03 | 0.00 |
| 255 | 3253.334 | 1.68E-03  | 0.00 |
| 256 | 777.9098 | -2.26E-03 | 0.00 |
| 257 | 3235.467 | 2.90E-04  | 0.00 |
| 258 | 2696.621 | 2.24E-04  | 0.00 |
| 259 | 295.0107 | -2.45E+01 | 0.00 |
| 260 | 67.4739  | -4.42E+01 | 0.00 |
| 261 | 241.5628 | -1.70E+01 | 0.00 |

**Table S9.** Vibrational frequencies ( $\omega_i/\text{cm}^{-1}$ ) at the respective optimized  $S_0$  states, Shift vector  $K_i$  (a.u.) and Huang-Rhys factor  $S_i$  of complex **4**.

|    | $\omega_i/\text{cm}^{-1}$ | $K_i$ (a.u.) | $S_i$ |
|----|---------------------------|--------------|-------|
| 1  | 20.0013                   | -2.28E+01    | 0.02  |
| 2  | 29.3166                   | -3.14E+01    | 0.07  |
| 3  | 38.1412                   | 1.80E+00     | 0.00  |
| 4  | 38.4779                   | -4.09E+00    | 0.00  |
| 5  | 41.7552                   | 3.62E-01     | 0.00  |
| 6  | 59.6003                   | 9.63E+00     | 0.01  |
| 7  | 62.0977                   | -9.59E+00    | 0.01  |
| 8  | 68.4931                   | -6.31E+00    | 0.01  |
| 9  | 87.2788                   | -4.71E+00    | 0.00  |
| 10 | 94.7923                   | 5.21E+00     | 0.01  |
| 11 | 112.1342                  | -1.20E+01    | 0.04  |
| 12 | 114.5182                  | -2.62E+01    | 0.18  |
| 13 | 131.3649                  | 8.47E-01     | 0.00  |
| 14 | 135.3877                  | 1.13E+01     | 0.04  |
| 15 | 137.992                   | 9.58E+00     | 0.03  |
| 16 | 148.9397                  | 4.61E-01     | 0.00  |



|    |          |           |      |
|----|----------|-----------|------|
| 17 | 155.7571 | 1.44E+01  | 0.07 |
| 18 | 160.5785 | 9.49E+00  | 0.03 |
| 19 | 167.8646 | -8.49E+00 | 0.03 |
| 20 | 190.9832 | 5.06E+00  | 0.01 |
| 21 | 204.0692 | -2.34E+00 | 0.00 |
| 22 | 208.861  | -7.56E+00 | 0.03 |
| 23 | 221.5072 | 2.17E+00  | 0.00 |
| 24 | 233.2944 | -6.91E+00 | 0.03 |
| 25 | 243.3251 | 9.44E+00  | 0.05 |
| 26 | 267.1311 | 2.98E+00  | 0.01 |
| 27 | 271.7108 | -5.72E+00 | 0.02 |
| 28 | 278.5223 | -1.98E+00 | 0.00 |
| 29 | 281.7039 | -1.60E+00 | 0.00 |
| 30 | 282.9426 | -7.93E-01 | 0.00 |
| 31 | 303.7413 | -7.20E-02 | 0.00 |
| 32 | 313.6214 | -7.61E+00 | 0.04 |
| 33 | 321.5169 | 9.41E+00  | 0.07 |
| 34 | 326.078  | 5.56E+00  | 0.02 |
| 35 | 361.8633 | 2.77E+00  | 0.01 |
| 36 | 368.4896 | -5.17E+00 | 0.02 |
| 37 | 375.6911 | 3.32E+00  | 0.01 |
| 38 | 384.7988 | -1.10E+01 | 0.11 |
| 39 | 409.4135 | -6.36E-03 | 0.00 |
| 40 | 426.9553 | -1.67E+00 | 0.00 |
| 41 | 450.6092 | -2.60E+00 | 0.01 |
| 42 | 466.1707 | -6.95E-01 | 0.00 |
| 43 | 473.6957 | -8.76E-01 | 0.00 |
| 44 | 483.5958 | 8.64E-02  | 0.00 |
| 45 | 484.9712 | 3.67E-02  | 0.00 |
| 46 | 497.5867 | 1.55E+00  | 0.00 |
| 47 | 513.4323 | 1.46E+00  | 0.00 |
| 48 | 515.2629 | -1.62E-01 | 0.00 |
| 49 | 525.6638 | 8.10E-01  | 0.00 |
| 50 | 529.9712 | -7.72E-02 | 0.00 |
| 51 | 532.8102 | -1.67E+00 | 0.00 |
| 52 | 538.9401 | 9.54E+00  | 0.11 |
| 53 | 550.1912 | 1.31E+00  | 0.00 |
| 54 | 562.5265 | -9.32E-01 | 0.00 |
| 55 | 568.9187 | 1.53E-01  | 0.00 |
| 56 | 572.1843 | -6.68E-01 | 0.00 |
| 57 | 588.8435 | 5.09E-01  | 0.00 |
| 58 | 591.104  | 1.38E+00  | 0.00 |
| 59 | 597.1005 | 7.17E+00  | 0.07 |
| 60 | 599.497  | -2.06E+00 | 0.01 |
| 61 | 599.9782 | 9.39E-01  | 0.00 |
| 62 | 604.6074 | -3.38E-01 | 0.00 |
| 63 | 607.1646 | -6.64E-01 | 0.00 |
| 64 | 625.7553 | -8.65E-02 | 0.00 |
| 65 | 630.785  | -4.99E+00 | 0.04 |
| 66 | 638.3629 | 1.79E-01  | 0.00 |
| 67 | 650.5289 | -8.02E-01 | 0.00 |

|     |          |           |      |
|-----|----------|-----------|------|
| 68  | 650.9766 | -1.10E+00 | 0.00 |
| 69  | 655.5361 | -5.39E-01 | 0.00 |
| 70  | 663.3166 | 1.26E-01  | 0.00 |
| 71  | 668.1361 | 1.56E-01  | 0.00 |
| 72  | 674.6508 | -1.26E+00 | 0.00 |
| 73  | 701.4218 | 1.26E-01  | 0.00 |
| 74  | 702.2067 | -2.12E-01 | 0.00 |
| 75  | 705.2051 | -2.23E-01 | 0.00 |
| 76  | 714.6163 | 4.57E-01  | 0.00 |
| 77  | 717.346  | -9.25E-01 | 0.00 |
| 78  | 728.4279 | -3.68E-01 | 0.00 |
| 79  | 732.7128 | -2.12E-01 | 0.00 |
| 80  | 735.8022 | 1.30E+00  | 0.00 |
| 81  | 741.1609 | -4.57E-02 | 0.00 |
| 82  | 742.0678 | 2.64E-01  | 0.00 |
| 83  | 744.4076 | 9.34E-01  | 0.00 |
| 84  | 748.602  | -1.87E-01 | 0.00 |
| 85  | 750.8112 | -1.59E-01 | 0.00 |
| 86  | 752.9329 | -5.85E-01 | 0.00 |
| 87  | 758.2959 | -1.09E-01 | 0.00 |
| 88  | 761.6473 | 2.60E-01  | 0.00 |
| 89  | 766.6617 | 1.90E-01  | 0.00 |
| 90  | 769.0453 | -8.19E-02 | 0.00 |
| 91  | 773.1097 | -2.07E-01 | 0.00 |
| 92  | 773.8706 | -1.21E-02 | 0.00 |
| 93  | 777.0375 | -4.53E-01 | 0.00 |
| 94  | 779.0009 | 8.64E-03  | 0.00 |
| 95  | 785.2721 | 1.42E-01  | 0.00 |
| 96  | 786.1856 | 5.51E-02  | 0.00 |
| 97  | 789.4492 | 1.86E-01  | 0.00 |
| 98  | 793.5832 | 4.92E-01  | 0.00 |
| 99  | 799.9565 | -7.59E-01 | 0.00 |
| 100 | 801.7434 | -2.75E+00 | 0.01 |
| 101 | 804.4071 | 8.70E-01  | 0.00 |
| 102 | 809.0876 | -2.15E-02 | 0.00 |
| 103 | 809.7253 | -4.37E-01 | 0.00 |
| 104 | 816.7829 | -3.77E-01 | 0.00 |
| 105 | 820.9703 | -3.96E-01 | 0.00 |
| 106 | 826.8842 | 3.11E-01  | 0.00 |
| 107 | 851.5176 | -2.23E-01 | 0.00 |
| 108 | 853.8864 | -1.07E-01 | 0.00 |
| 109 | 866.3906 | 9.96E-03  | 0.00 |
| 110 | 867.9896 | 1.81E-01  | 0.00 |
| 111 | 880.0587 | -1.62E-01 | 0.00 |
| 112 | 892.1452 | -2.91E+00 | 0.02 |
| 113 | 897.6808 | -1.01E-01 | 0.00 |
| 114 | 898.6522 | 2.41E-01  | 0.00 |
| 115 | 904.0217 | -1.27E-01 | 0.00 |
| 116 | 905.3175 | -1.94E-02 | 0.00 |
| 117 | 912.577  | 2.98E-03  | 0.00 |
| 118 | 917.1247 | -4.19E-02 | 0.00 |

|     |          |           |      |
|-----|----------|-----------|------|
| 119 | 919.5111 | -4.42E-02 | 0.00 |
| 120 | 931.0457 | 1.38E-01  | 0.00 |
| 121 | 935.1896 | -2.63E-01 | 0.00 |
| 122 | 935.7129 | -1.22E-01 | 0.00 |
| 123 | 941.6842 | -6.05E-02 | 0.00 |
| 124 | 947.1169 | -4.07E-02 | 0.00 |
| 125 | 948.2382 | -5.78E-03 | 0.00 |
| 126 | 950.9975 | -1.68E-01 | 0.00 |
| 127 | 953.4913 | -1.37E-02 | 0.00 |
| 128 | 955.8577 | -6.42E-02 | 0.00 |
| 129 | 957.2916 | -4.18E-02 | 0.00 |
| 130 | 963.8051 | -2.01E-02 | 0.00 |
| 131 | 964.1373 | -1.95E-02 | 0.00 |
| 132 | 966.2986 | -2.05E-01 | 0.00 |
| 133 | 967.4615 | 8.29E-02  | 0.00 |
| 134 | 967.7707 | -7.83E-03 | 0.00 |
| 135 | 970.3923 | -1.51E+00 | 0.01 |
| 136 | 974.9638 | -9.01E-02 | 0.00 |
| 137 | 976.0329 | -4.92E-02 | 0.00 |
| 138 | 980.2461 | 8.22E-03  | 0.00 |
| 139 | 983.3381 | -1.27E-01 | 0.00 |
| 140 | 985.0801 | 8.23E-02  | 0.00 |
| 141 | 989.3207 | 3.94E-02  | 0.00 |
| 142 | 993.229  | 3.88E-02  | 0.00 |
| 143 | 997.8984 | 1.94E-02  | 0.00 |
| 144 | 1003.778 | 6.12E-02  | 0.00 |
| 145 | 1019.771 | -1.00E-01 | 0.00 |
| 146 | 1020.557 | 3.84E-02  | 0.00 |
| 147 | 1026.749 | 1.24E-01  | 0.00 |
| 148 | 1035.861 | -1.91E-01 | 0.00 |
| 149 | 1042.199 | -6.45E-01 | 0.00 |
| 150 | 1043.01  | -1.08E+00 | 0.00 |
| 151 | 1050.371 | 6.79E-01  | 0.00 |
| 152 | 1061.436 | 3.18E-02  | 0.00 |
| 153 | 1066.039 | -9.87E-02 | 0.00 |
| 154 | 1077.244 | -2.90E+00 | 0.02 |
| 155 | 1079.29  | 3.46E+00  | 0.03 |
| 156 | 1085.939 | 2.00E+00  | 0.01 |
| 157 | 1086.486 | -2.68E+00 | 0.02 |
| 158 | 1093.115 | -3.13E-01 | 0.00 |
| 159 | 1105.642 | -2.43E-01 | 0.00 |
| 160 | 1111.092 | 9.37E-01  | 0.00 |
| 161 | 1117.775 | -1.61E-01 | 0.00 |
| 162 | 1148.603 | 4.06E-01  | 0.00 |
| 163 | 1151.139 | -1.53E-01 | 0.00 |
| 164 | 1154.315 | -1.49E-01 | 0.00 |
| 165 | 1170.936 | -1.16E+00 | 0.00 |
| 166 | 1171.896 | -2.36E+00 | 0.01 |
| 167 | 1179.57  | -7.93E-01 | 0.00 |
| 168 | 1189.544 | -5.17E-01 | 0.00 |
| 169 | 1192.362 | 2.05E+00  | 0.01 |

|     |          |           |      |
|-----|----------|-----------|------|
| 170 | 1194.378 | -9.21E-02 | 0.00 |
| 171 | 1196.135 | -4.63E-02 | 0.00 |
| 172 | 1212.567 | -2.99E+00 | 0.02 |
| 173 | 1247.475 | 2.52E-01  | 0.00 |
| 174 | 1248.554 | -3.65E-01 | 0.00 |
| 175 | 1262.417 | -3.53E-03 | 0.00 |
| 176 | 1303.764 | 2.11E-01  | 0.00 |
| 177 | 1307.324 | 2.71E-01  | 0.00 |
| 178 | 1313.416 | 7.82E-01  | 0.00 |
| 179 | 1323.105 | 4.08E+00  | 0.05 |
| 180 | 1335.948 | 1.90E-01  | 0.00 |
| 181 | 1338.801 | 3.06E+00  | 0.03 |
| 182 | 1342.274 | -6.03E+00 | 0.11 |
| 183 | 1344.553 | -3.46E-01 | 0.00 |
| 184 | 1345.547 | 5.09E-01  | 0.00 |
| 185 | 1350.609 | -5.65E-01 | 0.00 |
| 186 | 1368.568 | 1.36E+00  | 0.01 |
| 187 | 1373.792 | 3.17E-01  | 0.00 |
| 188 | 1396.514 | 7.09E+00  | 0.16 |
| 189 | 1425.365 | -2.62E-01 | 0.00 |
| 190 | 1426.056 | 8.90E-01  | 0.00 |
| 191 | 1447.169 | -6.64E+00 | 0.15 |
| 192 | 1451.466 | 8.52E-02  | 0.00 |
| 193 | 1475.112 | -1.35E-01 | 0.00 |
| 194 | 1487.36  | 2.85E+00  | 0.03 |
| 195 | 1490.153 | 1.61E-02  | 0.00 |
| 196 | 1493.869 | 1.29E+00  | 0.01 |
| 197 | 1494.551 | -4.31E+00 | 0.06 |
| 198 | 1506.819 | -6.68E-01 | 0.00 |
| 199 | 1511.391 | 2.99E+00  | 0.03 |
| 200 | 1530.123 | -4.23E+00 | 0.06 |
| 201 | 1535.188 | -2.06E-01 | 0.00 |
| 202 | 1536.814 | -1.35E-01 | 0.00 |
| 203 | 1547.866 | -8.54E+00 | 0.26 |
| 204 | 1558.416 | -8.64E-02 | 0.00 |
| 205 | 1566.438 | -2.35E+00 | 0.02 |
| 206 | 1603.576 | 1.19E+00  | 0.01 |
| 207 | 1634.837 | -4.34E+00 | 0.07 |
| 208 | 1639.693 | -1.11E-01 | 0.00 |
| 209 | 1645.148 | -8.05E-02 | 0.00 |
| 210 | 1650.968 | 4.79E-02  | 0.00 |
| 211 | 1664.501 | 3.27E-01  | 0.00 |
| 212 | 1677.008 | 5.69E+00  | 0.12 |
| 213 | 1686.62  | -1.23E-01 | 0.00 |
| 214 | 1690.531 | 2.14E-01  | 0.00 |
| 215 | 1703.976 | -5.50E-02 | 0.00 |
| 216 | 2682.204 | 3.41E-02  | 0.00 |
| 217 | 2686.363 | -8.38E-03 | 0.00 |
| 218 | 2687.157 | 9.11E-03  | 0.00 |
| 219 | 2692.286 | -1.97E-02 | 0.00 |
| 220 | 2697.24  | -1.86E-02 | 0.00 |

|     |          |           |      |
|-----|----------|-----------|------|
| 221 | 2699.122 | -8.66E-03 | 0.00 |
| 222 | 2708.043 | -1.51E-03 | 0.00 |
| 223 | 2721.354 | -6.37E-02 | 0.00 |
| 224 | 2734.896 | -1.10E-03 | 0.00 |
| 225 | 2782.735 | -1.06E-01 | 0.00 |
| 226 | 3198.956 | 2.21E-03  | 0.00 |
| 227 | 3202.396 | -7.40E-05 | 0.00 |
| 228 | 3205.472 | -7.30E-02 | 0.00 |
| 229 | 3207.986 | -2.72E-03 | 0.00 |
| 230 | 3209.856 | 1.30E-02  | 0.00 |
| 231 | 3213.278 | -4.03E-02 | 0.00 |
| 232 | 3217.417 | -2.47E-01 | 0.00 |
| 233 | 3222.975 | 1.34E-02  | 0.00 |
| 234 | 3224.689 | 2.37E-02  | 0.00 |
| 235 | 3225.39  | 7.00E-02  | 0.00 |
| 236 | 3230.878 | 3.75E-03  | 0.00 |
| 237 | 3233.975 | 1.34E-01  | 0.00 |
| 238 | 3234.819 | -1.53E-03 | 0.00 |
| 239 | 3236.384 | -4.57E-03 | 0.00 |
| 240 | 3242.752 | 5.64E-02  | 0.00 |
| 241 | 3250.264 | 6.44E-03  | 0.00 |
| 242 | 3251.244 | 5.89E-02  | 0.00 |
| 243 | 3255.245 | -5.92E-02 | 0.00 |
| 244 | 3255.325 | 5.17E-03  | 0.00 |
| 245 | 3260.128 | 1.70E-04  | 0.00 |
| 246 | 3262.151 | -1.38E-02 | 0.00 |
| 247 | 3268.025 | 3.38E-03  | 0.00 |
| 248 | 3272.768 | -1.51E-02 | 0.00 |
| 249 | 3302.123 | -1.57E-02 | 0.00 |

Table S10. Vibrational frequencies ( $\omega_i/\text{cm}^{-1}$ ) at the respective optimized  $S_0$  states, Shift vector  $K_i$  (a.u.) and Huang-Rhys factor  $S_i$  of complex **4a**.

|    | $\omega_i/\text{cm}^{-1}$ | $K_i$ (a.u.) | $S_i$ |
|----|---------------------------|--------------|-------|
| 1  | 20.8587                   | -1.20E+02    | 0.69  |
| 2  | 31.9226                   | -1.98E+02    | 2.87  |
| 3  | 35.7541                   | 6.06E+01     | 0.30  |
| 4  | 36.7299                   | 5.21E+01     | 0.23  |
| 5  | 41.8632                   | 1.48E+02     | 2.08  |
| 6  | 60.1927                   | -3.08E+01    | 0.13  |
| 7  | 66.2627                   | 1.30E+01     | 0.03  |
| 8  | 79.4682                   | 9.39E+01     | 1.60  |
| 9  | 84.3987                   | 3.15E+01     | 0.19  |
| 10 | 98.2619                   | 2.52E+01     | 0.14  |
| 11 | 109.9889                  | 9.82E+00     | 0.02  |
| 12 | 119.7078                  | -3.61E+01    | 0.36  |
| 13 | 130.321                   | -3.58E+01    | 0.38  |
| 14 | 137.9189                  | 4.47E+00     | 0.01  |
| 15 | 138.8376                  | 5.68E+00     | 0.01  |
| 16 | 159.8502                  | -7.70E+00    | 0.02  |
| 17 | 162.411                   | 2.80E+00     | 0.00  |

|    |          |           |      |
|----|----------|-----------|------|
| 18 | 168.891  | 1.47E+00  | 0.00 |
| 19 | 181.5982 | 3.44E+00  | 0.00 |
| 20 | 191.7028 | -3.76E+00 | 0.01 |
| 21 | 200.5543 | 1.32E+00  | 0.00 |
| 22 | 206.0669 | 1.08E+00  | 0.00 |
| 23 | 220.8655 | 9.01E-01  | 0.00 |
| 24 | 225.2167 | 4.21E+00  | 0.01 |
| 25 | 237.0236 | -3.66E+00 | 0.01 |
| 26 | 260.3666 | 5.79E+00  | 0.02 |
| 27 | 279.0149 | 1.15E+01  | 0.08 |
| 28 | 279.9245 | 5.18E+00  | 0.02 |
| 29 | 283.7357 | -4.63E+00 | 0.01 |
| 30 | 298.6875 | 4.30E+00  | 0.01 |
| 31 | 304.173  | 2.66E+00  | 0.00 |
| 32 | 319.6998 | 9.42E-01  | 0.00 |
| 33 | 348.5531 | -4.28E+00 | 0.01 |
| 34 | 358.2267 | 2.14E+00  | 0.00 |
| 35 | 362.4844 | 9.80E-01  | 0.00 |
| 36 | 368.3437 | -4.55E-01 | 0.00 |
| 37 | 373.3121 | 2.71E+00  | 0.01 |
| 38 | 404.4631 | -1.55E+00 | 0.00 |
| 39 | 420.897  | -7.58E-01 | 0.00 |
| 40 | 442.5217 | -7.34E+00 | 0.05 |
| 41 | 454.0951 | 4.52E+00  | 0.02 |
| 42 | 475.5108 | 9.96E-01  | 0.00 |
| 43 | 478.7524 | 8.51E-01  | 0.00 |
| 44 | 482.2714 | 9.88E-03  | 0.00 |
| 45 | 486.7302 | 1.42E+00  | 0.00 |
| 46 | 495.4258 | 4.86E-01  | 0.00 |
| 47 | 498.1545 | -5.85E-01 | 0.00 |
| 48 | 512.9558 | -2.10E+00 | 0.01 |
| 49 | 515.6197 | 2.78E-02  | 0.00 |
| 50 | 518.9831 | 1.65E+01  | 0.32 |
| 51 | 531.5728 | -2.49E+00 | 0.01 |
| 52 | 536.6173 | 1.46E+01  | 0.26 |
| 53 | 538.5907 | 1.72E+01  | 0.37 |
| 54 | 548.3231 | -6.55E-01 | 0.00 |
| 55 | 550.1549 | 5.44E-02  | 0.00 |
| 56 | 584.4123 | 9.22E-01  | 0.00 |
| 57 | 587.7161 | 3.49E-02  | 0.00 |
| 58 | 592.1121 | 8.51E-02  | 0.00 |
| 59 | 598.9092 | 4.09E-01  | 0.00 |
| 60 | 603.2665 | -2.07E-01 | 0.00 |
| 61 | 605.8532 | -1.01E-01 | 0.00 |
| 62 | 613.6767 | -5.15E+00 | 0.04 |
| 63 | 615.0102 | -1.26E+00 | 0.00 |
| 64 | 624.7822 | -1.37E-01 | 0.00 |
| 65 | 632.9205 | -1.39E+00 | 0.00 |
| 66 | 636.4731 | -3.48E-01 | 0.00 |
| 67 | 648.0878 | 2.11E-01  | 0.00 |
| 68 | 654.1962 | 1.79E+00  | 0.00 |

|     |          |           |      |
|-----|----------|-----------|------|
| 69  | 661.9387 | 4.66E+00  | 0.03 |
| 70  | 664.8316 | 3.27E+00  | 0.02 |
| 71  | 669.5236 | 9.94E-01  | 0.00 |
| 72  | 672.708  | 1.55E+00  | 0.00 |
| 73  | 695.3951 | 1.54E+00  | 0.00 |
| 74  | 701.9135 | -7.69E-01 | 0.00 |
| 75  | 703.8366 | 6.79E-01  | 0.00 |
| 76  | 712.2522 | 9.78E+00  | 0.16 |
| 77  | 714.6899 | 1.07E+00  | 0.00 |
| 78  | 722.1307 | -1.43E+01 | 0.34 |
| 79  | 726.2652 | 9.55E-01  | 0.00 |
| 80  | 731.3615 | -8.38E-01 | 0.00 |
| 81  | 740.9379 | -3.27E-01 | 0.00 |
| 82  | 743.9386 | 3.98E+00  | 0.03 |
| 83  | 746.273  | 5.43E-01  | 0.00 |
| 84  | 750.549  | 1.87E-01  | 0.00 |
| 85  | 755.2402 | -2.25E+00 | 0.01 |
| 86  | 757.4476 | 2.30E-01  | 0.00 |
| 87  | 763.68   | 3.36E-01  | 0.00 |
| 88  | 766.0846 | 1.77E-01  | 0.00 |
| 89  | 769.7918 | -1.33E-01 | 0.00 |
| 90  | 771.8795 | -1.22E+00 | 0.00 |
| 91  | 772.4151 | -4.38E-01 | 0.00 |
| 92  | 776.0403 | -4.29E-01 | 0.00 |
| 93  | 777.7288 | 8.18E-02  | 0.00 |
| 94  | 783.5315 | 1.35E-01  | 0.00 |
| 95  | 788.1313 | 2.60E-01  | 0.00 |
| 96  | 789.1005 | -3.85E-01 | 0.00 |
| 97  | 790.8031 | 8.06E-02  | 0.00 |
| 98  | 792.8714 | 3.41E-01  | 0.00 |
| 99  | 798.3908 | -2.98E-01 | 0.00 |
| 100 | 800.7755 | -9.52E-02 | 0.00 |
| 101 | 811.2117 | 1.96E-01  | 0.00 |
| 102 | 820.0305 | -2.85E-01 | 0.00 |
| 103 | 828.1392 | 6.13E-02  | 0.00 |
| 104 | 835.7903 | -1.16E+00 | 0.00 |
| 105 | 843.2402 | -8.30E-02 | 0.00 |
| 106 | 847.065  | 8.88E-01  | 0.00 |
| 107 | 852.3784 | -9.11E-01 | 0.00 |
| 108 | 871.2632 | 2.68E+00  | 0.01 |
| 109 | 880.3899 | 2.15E-01  | 0.00 |
| 110 | 882.5171 | -9.43E-01 | 0.00 |
| 111 | 884.6808 | 8.97E-01  | 0.00 |
| 112 | 892.8862 | -1.07E+00 | 0.00 |
| 113 | 893.9343 | -8.99E+00 | 0.17 |
| 114 | 911.0012 | -6.73E-01 | 0.00 |
| 115 | 911.2792 | -3.38E-01 | 0.00 |
| 116 | 913.038  | -3.93E-01 | 0.00 |
| 117 | 915.7858 | 2.41E-01  | 0.00 |
| 118 | 918.7109 | -2.86E-03 | 0.00 |
| 119 | 930.0933 | -2.26E-01 | 0.00 |

|     |          |           |      |
|-----|----------|-----------|------|
| 120 | 932.2049 | 5.07E-02  | 0.00 |
| 121 | 941.3954 | -8.08E-02 | 0.00 |
| 122 | 945.3529 | 4.76E-02  | 0.00 |
| 123 | 949.4967 | -2.53E-02 | 0.00 |
| 124 | 950.6005 | -1.85E-02 | 0.00 |
| 125 | 952.0432 | -7.69E-02 | 0.00 |
| 126 | 952.444  | -8.76E-02 | 0.00 |
| 127 | 955.5594 | -8.18E-02 | 0.00 |
| 128 | 958.9882 | -2.59E-02 | 0.00 |
| 129 | 962.2329 | 4.46E-03  | 0.00 |
| 130 | 964.8031 | 5.82E-02  | 0.00 |
| 131 | 966.2659 | -6.46E-02 | 0.00 |
| 132 | 972.428  | -2.75E-01 | 0.00 |
| 133 | 973.219  | 9.45E-01  | 0.00 |
| 134 | 974.2346 | 5.97E-01  | 0.00 |
| 135 | 975.9536 | 5.70E-02  | 0.00 |
| 136 | 978.9079 | -1.17E-02 | 0.00 |
| 137 | 979.8134 | -4.50E-01 | 0.00 |
| 138 | 986.7484 | 1.37E-01  | 0.00 |
| 139 | 990.1476 | 9.34E-02  | 0.00 |
| 140 | 991.0828 | -6.57E-02 | 0.00 |
| 141 | 994.5761 | -1.68E-01 | 0.00 |
| 142 | 997.0875 | 7.72E-01  | 0.00 |
| 143 | 1002.698 | 2.46E-01  | 0.00 |
| 144 | 1012.416 | 4.06E-02  | 0.00 |
| 145 | 1019.009 | 1.43E-01  | 0.00 |
| 146 | 1019.308 | -7.02E-02 | 0.00 |
| 147 | 1033.516 | -4.04E+00 | 0.04 |
| 148 | 1035.232 | 2.26E+00  | 0.01 |
| 149 | 1041.387 | 9.26E-01  | 0.00 |
| 150 | 1053.06  | 3.83E-01  | 0.00 |
| 151 | 1064.36  | -6.00E-02 | 0.00 |
| 152 | 1072.135 | 2.97E+00  | 0.02 |
| 153 | 1074.431 | -3.43E-01 | 0.00 |
| 154 | 1075.862 | 2.02E-01  | 0.00 |
| 155 | 1079.949 | 3.45E-01  | 0.00 |
| 156 | 1090.658 | -5.48E-03 | 0.00 |
| 157 | 1101.37  | 5.74E+00  | 0.08 |
| 158 | 1104.315 | -3.68E+00 | 0.03 |
| 159 | 1115.719 | -1.85E-01 | 0.00 |
| 160 | 1133.793 | -1.98E+00 | 0.01 |
| 161 | 1137.92  | 7.37E+00  | 0.14 |
| 162 | 1145.194 | 5.83E+00  | 0.09 |
| 163 | 1150.112 | -6.59E-03 | 0.00 |
| 164 | 1153.483 | -2.12E+00 | 0.01 |
| 165 | 1154.317 | -3.34E+00 | 0.03 |
| 166 | 1170.14  | -7.73E-01 | 0.00 |
| 167 | 1181.362 | -5.57E-01 | 0.00 |
| 168 | 1190.713 | -4.61E-01 | 0.00 |
| 169 | 1192.001 | 2.92E+00  | 0.02 |
| 170 | 1194.447 | 3.77E-02  | 0.00 |



|     |          |           |      |
|-----|----------|-----------|------|
| 171 | 1195.289 | -1.31E-01 | 0.00 |
| 172 | 1210.123 | -2.15E-01 | 0.00 |
| 173 | 1245.172 | -4.93E-01 | 0.00 |
| 174 | 1262.847 | 2.35E-01  | 0.00 |
| 175 | 1265.039 | -1.31E+00 | 0.00 |
| 176 | 1272.592 | 7.24E-01  | 0.00 |
| 177 | 1296.138 | -1.50E+00 | 0.01 |
| 178 | 1300.976 | 2.01E-01  | 0.00 |
| 179 | 1315.091 | 5.01E+00  | 0.08 |
| 180 | 1330.282 | 4.70E+00  | 0.07 |
| 181 | 1333.136 | -2.39E-01 | 0.00 |
| 182 | 1339.126 | 7.40E-02  | 0.00 |
| 183 | 1341.133 | 9.92E-02  | 0.00 |
| 184 | 1344.288 | 1.76E-01  | 0.00 |
| 185 | 1346.354 | -1.70E-01 | 0.00 |
| 186 | 1359.496 | -5.43E+00 | 0.09 |
| 187 | 1383.466 | -2.89E+00 | 0.03 |
| 188 | 1398.296 | 3.18E-01  | 0.00 |
| 189 | 1408.187 | -2.71E-01 | 0.00 |
| 190 | 1430.469 | -3.22E-01 | 0.00 |
| 191 | 1432.538 | -3.63E+00 | 0.04 |
| 192 | 1457.915 | -6.36E-01 | 0.00 |
| 193 | 1473.715 | 2.10E+00  | 0.01 |
| 194 | 1476.755 | -2.30E-01 | 0.00 |
| 195 | 1488.329 | -6.55E-01 | 0.00 |
| 196 | 1490.326 | 1.41E+00  | 0.01 |
| 197 | 1491.251 | 9.33E-01  | 0.00 |
| 198 | 1500.451 | -5.84E-01 | 0.00 |
| 199 | 1510.514 | -1.30E+00 | 0.01 |
| 200 | 1524.424 | 1.26E+00  | 0.01 |
| 201 | 1530.019 | -3.51E-01 | 0.00 |
| 202 | 1533.782 | 1.07E-01  | 0.00 |
| 203 | 1562.269 | -8.68E+00 | 0.27 |
| 204 | 1570.721 | -8.96E-01 | 0.00 |
| 205 | 1582.132 | 2.74E+00  | 0.03 |
| 206 | 1614.295 | -4.89E-02 | 0.00 |
| 207 | 1622.311 | 1.43E+00  | 0.01 |
| 208 | 1630.319 | 7.47E-01  | 0.00 |
| 209 | 1641.523 | -5.55E+00 | 0.12 |
| 210 | 1643.432 | -9.19E-02 | 0.00 |
| 211 | 1648.992 | 8.64E-01  | 0.00 |
| 212 | 1659.393 | 3.23E-01  | 0.00 |
| 213 | 1682.687 | 5.41E-02  | 0.00 |
| 214 | 1685.29  | -7.48E-02 | 0.00 |
| 215 | 1699.026 | -9.09E-02 | 0.00 |
| 216 | 2684.078 | -1.24E-02 | 0.00 |
| 217 | 2686.37  | -1.19E-02 | 0.00 |
| 218 | 2686.991 | -8.03E-03 | 0.00 |
| 219 | 2690.321 | 3.43E-03  | 0.00 |
| 220 | 2696.207 | -1.15E-02 | 0.00 |
| 221 | 2697.684 | -1.49E-02 | 0.00 |

|     |          |           |      |
|-----|----------|-----------|------|
| 222 | 2706.981 | 7.75E-03  | 0.00 |
| 223 | 2722.104 | 1.02E-01  | 0.00 |
| 224 | 2739.454 | -9.57E-03 | 0.00 |
| 225 | 2785.952 | -3.06E-02 | 0.00 |
| 226 | 3196.604 | 3.25E-02  | 0.00 |
| 227 | 3205.474 | 3.15E-02  | 0.00 |
| 228 | 3207.586 | 1.16E+00  | 0.01 |
| 229 | 3211.46  | 4.44E-01  | 0.00 |
| 230 | 3216.724 | 1.96E-02  | 0.00 |
| 231 | 3221.432 | -2.18E-01 | 0.00 |
| 232 | 3228.41  | -8.79E-01 | 0.01 |
| 233 | 3229.673 | -1.77E-02 | 0.00 |
| 234 | 3230.205 | -2.12E-02 | 0.00 |
| 235 | 3232.069 | 9.92E-02  | 0.00 |
| 236 | 3234.663 | -1.88E-02 | 0.00 |
| 237 | 3236.42  | 1.70E-02  | 0.00 |
| 238 | 3240.28  | 1.03E-02  | 0.00 |
| 239 | 3243.519 | 1.52E+00  | 0.02 |
| 240 | 3249.74  | -1.19E-02 | 0.00 |
| 241 | 3252.881 | 2.50E-01  | 0.00 |
| 242 | 3258.916 | -3.23E-02 | 0.00 |
| 243 | 3261.376 | 1.98E-02  | 0.00 |
| 244 | 3264.01  | 4.53E-01  | 0.00 |
| 245 | 3268.795 | -3.86E-02 | 0.00 |
| 246 | 3270.167 | -2.11E-01 | 0.00 |
| 247 | 3270.435 | 4.47E-03  | 0.00 |
| 248 | 3294.543 | 3.24E-02  | 0.00 |
| 249 | 3302.603 | -1.62E-02 | 0.00 |

**Table S11.** Vibrational frequencies ( $\omega_i/\text{cm}^{-1}$ ) at the respective optimized  $S_0$  states, Shift vector  $K_i$  (a.u.) and Huang-Rhys factor  $S_i$  of complex **5**.

|    | $\omega_i/\text{cm}^{-1}$ | $K_i$ (a.u.) | $S_i$ |
|----|---------------------------|--------------|-------|
| 1  | 24.1717                   | 4.37E+01     | 0.11  |
| 2  | 25.5456                   | 2.21E+01     | 0.03  |
| 3  | 36.3079                   | 6.20E+00     | 0.00  |
| 4  | 39.7951                   | -3.74E+01    | 0.13  |
| 5  | 45.1158                   | -1.79E+01    | 0.03  |
| 6  | 55.3301                   | -7.55E+00    | 0.01  |
| 7  | 60.9644                   | -1.98E+01    | 0.05  |
| 8  | 64.4509                   | -6.94E+00    | 0.01  |
| 9  | 87.7979                   | -1.01E+00    | 0.00  |
| 10 | 97.0771                   | -1.94E+00    | 0.00  |
| 11 | 104.6369                  | 2.22E+01     | 0.12  |
| 12 | 114.032                   | -2.69E+01    | 0.19  |
| 13 | 126.4037                  | 8.05E+00     | 0.02  |
| 14 | 132.6438                  | 1.31E+01     | 0.05  |
| 15 | 133.21                    | -1.15E+01    | 0.04  |
| 16 | 145.0019                  | 1.02E+01     | 0.03  |
| 17 | 150.7964                  | 3.36E+00     | 0.00  |
| 18 | 163.9196                  | 1.13E+01     | 0.05  |

|    |          |           |      |
|----|----------|-----------|------|
| 19 | 176.0051 | -2.91E+00 | 0.00 |
| 20 | 196.9196 | -9.09E+00 | 0.04 |
| 21 | 203.2724 | 8.16E+00  | 0.03 |
| 22 | 209.5543 | 8.69E+00  | 0.04 |
| 23 | 220.4823 | 8.69E+00  | 0.04 |
| 24 | 240.6291 | 7.76E-01  | 0.00 |
| 25 | 243.8097 | -1.92E+01 | 0.21 |
| 26 | 260.5489 | 4.20E+00  | 0.01 |
| 27 | 270.4587 | 2.98E-01  | 0.00 |
| 28 | 272.257  | 3.39E+00  | 0.01 |
| 29 | 280.4078 | -1.56E+00 | 0.00 |
| 30 | 287.3718 | 8.36E+00  | 0.05 |
| 31 | 305.0504 | -2.84E+00 | 0.01 |
| 32 | 314.9287 | -5.66E-01 | 0.00 |
| 33 | 336.5123 | -1.67E+00 | 0.00 |
| 34 | 339.4087 | 3.19E+00  | 0.01 |
| 35 | 365.1544 | 6.85E-01  | 0.00 |
| 36 | 369.4169 | -1.81E+00 | 0.00 |
| 37 | 383.1457 | -1.27E+00 | 0.00 |
| 38 | 388.5156 | 6.57E+00  | 0.04 |
| 39 | 416.0573 | 1.65E+00  | 0.00 |
| 40 | 430.7055 | 1.17E+00  | 0.00 |
| 41 | 454.6607 | 1.14E-01  | 0.00 |
| 42 | 467.2761 | -4.75E-01 | 0.00 |
| 43 | 475.0396 | -1.72E+00 | 0.00 |
| 44 | 481.4288 | -4.51E-01 | 0.00 |
| 45 | 486.9692 | -1.14E-01 | 0.00 |
| 46 | 498.8932 | 1.39E+00  | 0.00 |
| 47 | 510.6257 | -7.79E-01 | 0.00 |
| 48 | 514.8688 | 5.10E-01  | 0.00 |
| 49 | 519.4222 | 5.16E+00  | 0.03 |
| 50 | 523.3776 | 6.79E-01  | 0.00 |
| 51 | 531.1475 | 4.62E+00  | 0.03 |
| 52 | 531.7615 | 2.42E+00  | 0.01 |
| 53 | 549.3389 | 3.23E-01  | 0.00 |
| 54 | 556.6053 | 9.01E+00  | 0.10 |
| 55 | 562.5324 | 6.60E+00  | 0.06 |
| 56 | 569.7436 | -2.72E-01 | 0.00 |
| 57 | 581.0085 | -8.45E+00 | 0.09 |
| 58 | 586.2553 | 2.12E+00  | 0.01 |
| 59 | 589.0272 | -1.26E+00 | 0.00 |
| 60 | 590.4321 | 1.05E+00  | 0.00 |
| 61 | 598.8718 | -3.25E-01 | 0.00 |
| 62 | 604.2955 | 5.61E-01  | 0.00 |
| 63 | 606.7061 | -6.01E-01 | 0.00 |
| 64 | 625.7539 | -1.90E-01 | 0.00 |
| 65 | 627.3455 | 2.53E-01  | 0.00 |
| 66 | 637.4675 | 5.76E-02  | 0.00 |
| 67 | 649.3402 | -4.78E-01 | 0.00 |
| 68 | 655.0112 | -1.22E-01 | 0.00 |
| 69 | 659.8452 | -4.04E-01 | 0.00 |

|     |          |           |      |
|-----|----------|-----------|------|
| 70  | 668.7738 | -1.22E-01 | 0.00 |
| 71  | 676.7746 | 1.20E+00  | 0.00 |
| 72  | 683.8873 | 3.36E-01  | 0.00 |
| 73  | 691.4833 | 1.13E-01  | 0.00 |
| 74  | 701.8937 | -4.22E-01 | 0.00 |
| 75  | 706.0218 | 3.54E-01  | 0.00 |
| 76  | 709.2589 | -4.25E-01 | 0.00 |
| 77  | 714.4272 | 2.37E-01  | 0.00 |
| 78  | 722.7173 | 1.03E-01  | 0.00 |
| 79  | 727.8064 | 3.52E-01  | 0.00 |
| 80  | 736.4692 | 1.30E+00  | 0.00 |
| 81  | 740.3436 | -1.03E-01 | 0.00 |
| 82  | 741.3666 | 3.91E-01  | 0.00 |
| 83  | 743.7293 | -4.99E-03 | 0.00 |
| 84  | 748.114  | -1.32E-01 | 0.00 |
| 85  | 749.9988 | -4.55E-01 | 0.00 |
| 86  | 753.2839 | 1.61E-01  | 0.00 |
| 87  | 754.4706 | 5.29E-01  | 0.00 |
| 88  | 758.2633 | 3.12E-01  | 0.00 |
| 89  | 761.0898 | -8.50E-01 | 0.00 |
| 90  | 766.4132 | 1.25E-01  | 0.00 |
| 91  | 768.29   | 2.97E-01  | 0.00 |
| 92  | 769.0536 | 3.16E-01  | 0.00 |
| 93  | 772.3278 | 3.87E-01  | 0.00 |
| 94  | 776.4471 | -3.13E-01 | 0.00 |
| 95  | 778.4159 | 7.84E-02  | 0.00 |
| 96  | 779.8175 | 1.86E-01  | 0.00 |
| 97  | 789.4306 | 4.44E-02  | 0.00 |
| 98  | 793.0571 | 1.73E-01  | 0.00 |
| 99  | 799.3215 | 2.44E-01  | 0.00 |
| 100 | 802.5356 | -3.61E+00 | 0.02 |
| 101 | 804.6703 | -9.08E-01 | 0.00 |
| 102 | 805.9273 | 4.16E-02  | 0.00 |
| 103 | 808.6594 | 1.10E-01  | 0.00 |
| 104 | 810.9151 | 3.09E-02  | 0.00 |
| 105 | 822.8625 | -2.28E-01 | 0.00 |
| 106 | 826.5452 | 4.25E-01  | 0.00 |
| 107 | 849.2515 | -2.02E-01 | 0.00 |
| 108 | 852.1017 | -5.26E-02 | 0.00 |
| 109 | 872.5417 | 2.17E-02  | 0.00 |
| 110 | 874.1678 | -3.92E-01 | 0.00 |
| 111 | 878.2751 | 5.77E-02  | 0.00 |
| 112 | 879.0645 | 2.36E-01  | 0.00 |
| 113 | 880.8313 | -8.48E-02 | 0.00 |
| 114 | 889.9712 | 6.11E-01  | 0.00 |
| 115 | 892.3668 | -3.44E-01 | 0.00 |
| 116 | 905.3856 | -9.88E-02 | 0.00 |
| 117 | 912.1057 | -1.31E-01 | 0.00 |
| 118 | 917.0702 | -1.32E-01 | 0.00 |
| 119 | 919.0604 | 8.92E-02  | 0.00 |
| 120 | 930.5847 | -1.52E-01 | 0.00 |

|     |          |           |      |
|-----|----------|-----------|------|
| 121 | 935.8901 | -1.35E-02 | 0.00 |
| 122 | 941.1251 | -8.42E-02 | 0.00 |
| 123 | 946.8457 | 3.03E-01  | 0.00 |
| 124 | 948.9969 | -6.66E-02 | 0.00 |
| 125 | 950.8815 | 2.62E-01  | 0.00 |
| 126 | 953.3782 | -1.08E-01 | 0.00 |
| 127 | 954.8517 | 3.63E-01  | 0.00 |
| 128 | 955.9963 | -1.43E-01 | 0.00 |
| 129 | 956.9774 | -2.04E-01 | 0.00 |
| 130 | 957.8158 | -1.10E-01 | 0.00 |
| 131 | 959.3021 | 2.48E-02  | 0.00 |
| 132 | 962.5009 | -1.78E-01 | 0.00 |
| 133 | 964.5142 | 9.42E-02  | 0.00 |
| 134 | 967.7856 | 1.65E-01  | 0.00 |
| 135 | 973.9029 | 1.12E+00  | 0.00 |
| 136 | 976.125  | 1.92E+00  | 0.01 |
| 137 | 979.5938 | -1.10E-01 | 0.00 |
| 138 | 979.983  | 4.93E-02  | 0.00 |
| 139 | 984.0292 | -6.65E-02 | 0.00 |
| 140 | 987.6921 | -3.13E-01 | 0.00 |
| 141 | 995.1356 | 9.34E-02  | 0.00 |
| 142 | 1002.173 | -9.81E-03 | 0.00 |
| 143 | 1003.634 | 1.46E-01  | 0.00 |
| 144 | 1007.375 | -3.25E-02 | 0.00 |
| 145 | 1011.669 | 1.05E-02  | 0.00 |
| 146 | 1017.298 | -5.62E-01 | 0.00 |
| 147 | 1020.148 | 1.37E-03  | 0.00 |
| 148 | 1036.014 | -9.76E-02 | 0.00 |
| 149 | 1041.981 | 7.56E-02  | 0.00 |
| 150 | 1046.463 | -1.77E+00 | 0.01 |
| 151 | 1051.731 | -1.19E+00 | 0.00 |
| 152 | 1059.288 | 1.22E+00  | 0.00 |
| 153 | 1063.61  | -2.90E+00 | 0.02 |
| 154 | 1065.948 | 1.02E+00  | 0.00 |
| 155 | 1068.968 | -1.13E-02 | 0.00 |
| 156 | 1078.588 | 4.65E-01  | 0.00 |
| 157 | 1078.632 | -1.28E+00 | 0.00 |
| 158 | 1091.784 | -1.04E+00 | 0.00 |
| 159 | 1093.612 | -8.82E-01 | 0.00 |
| 160 | 1102.76  | -2.29E+00 | 0.01 |
| 161 | 1118.143 | 6.49E-02  | 0.00 |
| 162 | 1150.766 | 3.93E-02  | 0.00 |
| 163 | 1158.615 | 4.97E-01  | 0.00 |
| 164 | 1160.435 | 4.45E-01  | 0.00 |
| 165 | 1173.627 | 1.08E+00  | 0.00 |
| 166 | 1174.582 | 1.42E+00  | 0.01 |
| 167 | 1181.485 | -2.86E+00 | 0.02 |
| 168 | 1192.419 | -2.44E-02 | 0.00 |
| 169 | 1196.062 | -3.48E-03 | 0.00 |
| 170 | 1198.667 | 1.83E-01  | 0.00 |
| 171 | 1202.226 | -2.04E+00 | 0.01 |

|     |          |           |      |
|-----|----------|-----------|------|
| 172 | 1211.545 | -2.64E+00 | 0.02 |
| 173 | 1236.629 | 2.60E-01  | 0.00 |
| 174 | 1245.064 | -5.48E-02 | 0.00 |
| 175 | 1272.155 | 5.09E-02  | 0.00 |
| 176 | 1286.19  | -3.01E-01 | 0.00 |
| 177 | 1291.519 | -2.35E+00 | 0.02 |
| 178 | 1305.482 | 3.29E-01  | 0.00 |
| 179 | 1323.813 | -3.59E-02 | 0.00 |
| 180 | 1335.868 | 2.93E-01  | 0.00 |
| 181 | 1340.687 | -5.41E+00 | 0.09 |
| 182 | 1343.486 | -1.63E+00 | 0.01 |
| 183 | 1345.034 | -3.33E-01 | 0.00 |
| 184 | 1345.645 | -1.97E-01 | 0.00 |
| 185 | 1358.408 | 5.13E-02  | 0.00 |
| 186 | 1377.648 | 6.40E+00  | 0.13 |
| 187 | 1390.286 | 9.49E-02  | 0.00 |
| 188 | 1403.25  | 4.71E+00  | 0.07 |
| 189 | 1414.264 | -1.48E-01 | 0.00 |
| 190 | 1425.35  | -8.45E+00 | 0.23 |
| 191 | 1452.175 | 4.83E-02  | 0.00 |
| 192 | 1463.811 | -1.02E-01 | 0.00 |
| 193 | 1473.255 | -2.15E-01 | 0.00 |
| 194 | 1486.032 | 1.88E-01  | 0.00 |
| 195 | 1490.164 | -7.28E-01 | 0.00 |
| 196 | 1492.2   | 4.57E+00  | 0.07 |
| 197 | 1493.793 | -1.91E-01 | 0.00 |
| 198 | 1509.926 | -1.87E+00 | 0.01 |
| 199 | 1513.714 | -2.56E+00 | 0.02 |
| 200 | 1523.082 | 8.37E+00  | 0.24 |
| 201 | 1533.479 | 7.38E-01  | 0.00 |
| 202 | 1535.215 | 1.56E+00  | 0.01 |
| 203 | 1538.578 | 6.20E+00  | 0.14 |
| 204 | 1560.16  | 1.77E+00  | 0.01 |
| 205 | 1560.754 | 6.09E-01  | 0.00 |
| 206 | 1607.052 | -2.37E+00 | 0.02 |
| 207 | 1634.464 | 2.65E-01  | 0.00 |
| 208 | 1640.936 | -5.99E+00 | 0.13 |
| 209 | 1650.096 | 1.71E-01  | 0.00 |
| 210 | 1651.216 | -2.79E-01 | 0.00 |
| 211 | 1660.324 | -3.21E+00 | 0.04 |
| 212 | 1665.58  | -5.05E-01 | 0.00 |
| 213 | 1681.111 | 8.23E-02  | 0.00 |
| 214 | 1686.161 | 6.95E-02  | 0.00 |
| 215 | 1713.962 | -3.75E-02 | 0.00 |
| 216 | 2679.689 | 2.37E-02  | 0.00 |
| 217 | 2684.602 | -3.23E-03 | 0.00 |
| 218 | 2686.795 | 1.13E-02  | 0.00 |
| 219 | 2692.005 | -1.64E-02 | 0.00 |
| 220 | 2697.107 | -1.13E-02 | 0.00 |
| 221 | 2699.973 | -1.73E-02 | 0.00 |
| 222 | 2708.649 | 2.31E-02  | 0.00 |

|     |          |           |      |
|-----|----------|-----------|------|
| 223 | 2719.817 | -1.60E-02 | 0.00 |
| 224 | 2734.695 | -1.37E-03 | 0.00 |
| 225 | 2776.048 | -9.26E-02 | 0.00 |
| 226 | 3201.864 | -1.61E-03 | 0.00 |
| 227 | 3208.489 | 2.57E-02  | 0.00 |
| 228 | 3209.03  | 1.48E-02  | 0.00 |
| 229 | 3209.993 | 5.99E-02  | 0.00 |
| 230 | 3214.335 | 2.83E-04  | 0.00 |
| 231 | 3214.668 | -7.01E-04 | 0.00 |
| 232 | 3221.761 | -1.56E-03 | 0.00 |
| 233 | 3222.895 | -6.69E-02 | 0.00 |
| 234 | 3226.235 | -4.72E-02 | 0.00 |
| 235 | 3228.939 | 1.92E-02  | 0.00 |
| 236 | 3231.706 | 2.89E-03  | 0.00 |
| 237 | 3234.545 | -8.21E-03 | 0.00 |
| 238 | 3235.577 | -1.72E-02 | 0.00 |
| 239 | 3238.198 | -7.68E-03 | 0.00 |
| 240 | 3241.892 | -2.43E-03 | 0.00 |
| 241 | 3242.462 | 5.08E-02  | 0.00 |
| 242 | 3243.569 | 6.61E-02  | 0.00 |
| 243 | 3244.746 | 1.97E-03  | 0.00 |
| 244 | 3249.994 | 2.74E-02  | 0.00 |
| 245 | 3258.569 | -2.46E-01 | 0.00 |
| 246 | 3261.67  | -3.07E-02 | 0.00 |
| 247 | 3268.183 | 4.48E-03  | 0.00 |
| 248 | 3281.122 | -2.38E-02 | 0.00 |
| 249 | 3284.679 | 3.08E-01  | 0.00 |

**Table S12.** Vibrational frequencies ( $\omega_i/\text{cm}^{-1}$ ) at the respective optimized  $S_0$  states, Shift vector  $K_i$  (a.u.) and Huang-Rhys factor  $S_i$  of complex **5a**.

|    | $\omega_i/\text{cm}^{-1}$ | $K_i$ (a.u.) | $S_i$ |
|----|---------------------------|--------------|-------|
| 1  | 23.3028                   | -1.41E+02    | 1.05  |
| 2  | 26.524                    | -1.11E+02    | 0.75  |
| 3  | 34.6044                   | -7.49E+01    | 0.44  |
| 4  | 41.3289                   | -9.24E+01    | 0.81  |
| 5  | 44.921                    | 7.63E-01     | 0.00  |
| 6  | 65.7973                   | 1.80E+01     | 0.05  |
| 7  | 70.1682                   | 5.09E+01     | 0.41  |
| 8  | 74.9498                   | -3.20E+01    | 0.18  |
| 9  | 84.3938                   | -2.84E+00    | 0.00  |
| 10 | 98.1448                   | 2.01E+01     | 0.09  |
| 11 | 108.162                   | -3.04E+01    | 0.23  |
| 12 | 117.3233                  | -6.13E+00    | 0.01  |
| 13 | 125.6733                  | 5.19E+00     | 0.01  |
| 14 | 127.2824                  | 5.63E+00     | 0.01  |
| 15 | 141.595                   | -2.69E+00    | 0.00  |
| 16 | 158.0705                  | -4.41E+00    | 0.01  |
| 17 | 163.9889                  | -8.71E+00    | 0.03  |
| 18 | 166.6933                  | 1.18E+01     | 0.05  |
| 19 | 188.6192                  | 9.91E+00     | 0.04  |

|    |          |           |      |
|----|----------|-----------|------|
| 20 | 195.8739 | -3.23E+00 | 0.00 |
| 21 | 203.2633 | 7.77E+00  | 0.03 |
| 22 | 203.8616 | -7.89E+00 | 0.03 |
| 23 | 211.2299 | -6.41E+00 | 0.02 |
| 24 | 230.3147 | 4.99E+00  | 0.01 |
| 25 | 249.4449 | 1.85E+00  | 0.00 |
| 26 | 257.2579 | -2.42E+01 | 0.34 |
| 27 | 270.4775 | -2.08E+01 | 0.27 |
| 28 | 278.5929 | -1.30E+00 | 0.00 |
| 29 | 284.9041 | 4.53E+00  | 0.01 |
| 30 | 296.5824 | -3.98E+00 | 0.01 |
| 31 | 307.4684 | 4.27E+00  | 0.01 |
| 32 | 325.7797 | 2.48E-01  | 0.00 |
| 33 | 359.3554 | 9.66E-01  | 0.00 |
| 34 | 364.7619 | 1.19E+00  | 0.00 |
| 35 | 366.6435 | 3.95E-01  | 0.00 |
| 36 | 369.3127 | 8.33E-01  | 0.00 |
| 37 | 374.8501 | 1.77E-01  | 0.00 |
| 38 | 399.8327 | -7.60E+00 | 0.05 |
| 39 | 423.2722 | 8.06E-01  | 0.00 |
| 40 | 446.576  | 5.19E+00  | 0.03 |
| 41 | 453.0101 | 1.79E+00  | 0.00 |
| 42 | 468.365  | -1.15E+00 | 0.00 |
| 43 | 477.7654 | -1.04E+01 | 0.12 |
| 44 | 484.0306 | 1.65E+00  | 0.00 |
| 45 | 490.6027 | 1.96E+00  | 0.00 |
| 46 | 498.8258 | -1.42E+00 | 0.00 |
| 47 | 499.8943 | -3.20E+00 | 0.01 |
| 48 | 513.8553 | 1.71E+00  | 0.00 |
| 49 | 516.9892 | 3.35E+00  | 0.01 |
| 50 | 522.1691 | 2.36E+00  | 0.01 |
| 51 | 525.9682 | -9.69E+00 | 0.11 |
| 52 | 529.1067 | 6.80E+00  | 0.06 |
| 53 | 536.0668 | -1.17E+01 | 0.17 |
| 54 | 548.069  | 5.04E-01  | 0.00 |
| 55 | 549.6806 | 3.18E-01  | 0.00 |
| 56 | 583.4827 | 2.00E+00  | 0.01 |
| 57 | 586.9486 | 2.83E+00  | 0.01 |
| 58 | 589.5235 | 1.09E+01  | 0.16 |
| 59 | 597.3054 | -2.37E-01 | 0.00 |
| 60 | 601.1102 | 1.64E+00  | 0.00 |
| 61 | 602.7852 | 2.03E-01  | 0.00 |
| 62 | 603.1042 | -7.08E-01 | 0.00 |
| 63 | 606.3869 | 9.70E-01  | 0.00 |
| 64 | 621.1445 | 2.23E+00  | 0.01 |
| 65 | 624.3509 | -5.58E-01 | 0.00 |
| 66 | 634.4359 | -8.62E-01 | 0.00 |
| 67 | 638.6424 | 3.73E+00  | 0.02 |
| 68 | 643.0945 | 5.99E-01  | 0.00 |
| 69 | 653.7793 | 4.23E-01  | 0.00 |
| 70 | 661.9977 | 4.72E+00  | 0.03 |



|     |          |           |      |
|-----|----------|-----------|------|
| 71  | 667.8647 | -1.03E-01 | 0.00 |
| 72  | 682.7124 | 9.54E-01  | 0.00 |
| 73  | 699.3748 | -1.58E-02 | 0.00 |
| 74  | 700.6798 | -2.08E-01 | 0.00 |
| 75  | 704.8165 | -4.00E-01 | 0.00 |
| 76  | 713.4902 | 3.04E+00  | 0.02 |
| 77  | 714.23   | 6.43E+00  | 0.07 |
| 78  | 727.1489 | 1.37E-01  | 0.00 |
| 79  | 730.3183 | 1.98E-01  | 0.00 |
| 80  | 739.3245 | -6.89E+00 | 0.08 |
| 81  | 740.7618 | -2.68E-01 | 0.00 |
| 82  | 745.6787 | 1.20E+00  | 0.00 |
| 83  | 748.2394 | -1.25E-01 | 0.00 |
| 84  | 749.3014 | -1.46E+00 | 0.00 |
| 85  | 755.3889 | 3.83E-01  | 0.00 |
| 86  | 758.5337 | 1.20E+00  | 0.00 |
| 87  | 762.993  | 3.51E-01  | 0.00 |
| 88  | 766.409  | 8.68E-02  | 0.00 |
| 89  | 767.8122 | 5.82E-01  | 0.00 |
| 90  | 769.6704 | 6.29E-01  | 0.00 |
| 91  | 772.701  | -1.56E-01 | 0.00 |
| 92  | 775.4422 | -6.37E-01 | 0.00 |
| 93  | 776.4738 | -1.05E+00 | 0.00 |
| 94  | 781.7124 | 8.15E-01  | 0.00 |
| 95  | 783.7436 | 5.32E-02  | 0.00 |
| 96  | 788.8573 | 1.21E-01  | 0.00 |
| 97  | 789.717  | 2.66E+00  | 0.01 |
| 98  | 794.5552 | -2.54E-01 | 0.00 |
| 99  | 795.6986 | -6.08E-01 | 0.00 |
| 100 | 799.9439 | 3.88E-01  | 0.00 |
| 101 | 810.8492 | -6.31E-01 | 0.00 |
| 102 | 826.3967 | -4.08E-02 | 0.00 |
| 103 | 828.4638 | 4.09E-01  | 0.00 |
| 104 | 830.7349 | 9.15E-01  | 0.00 |
| 105 | 840.8794 | 2.20E-01  | 0.00 |
| 106 | 843.4038 | -5.93E-01 | 0.00 |
| 107 | 854.0555 | 8.63E-02  | 0.00 |
| 108 | 871.3235 | 2.30E+00  | 0.01 |
| 109 | 876.9153 | 3.02E-02  | 0.00 |
| 110 | 880.769  | 1.78E+00  | 0.01 |
| 111 | 884.4701 | -1.63E+00 | 0.01 |
| 112 | 891.1848 | -2.66E-01 | 0.00 |
| 113 | 892.1444 | -4.41E-01 | 0.00 |
| 114 | 897.1489 | 3.68E-02  | 0.00 |
| 115 | 905.9914 | 6.65E-02  | 0.00 |
| 116 | 912.5829 | -2.81E-01 | 0.00 |
| 117 | 917.0228 | -1.78E-01 | 0.00 |
| 118 | 927.9039 | -1.58E-02 | 0.00 |
| 119 | 938.1587 | 2.09E-01  | 0.00 |
| 120 | 938.6071 | 3.25E-01  | 0.00 |
| 121 | 939.8456 | 1.96E-01  | 0.00 |

|     |          |           |      |
|-----|----------|-----------|------|
| 122 | 940.2283 | 1.48E-01  | 0.00 |
| 123 | 948.5181 | -2.59E-01 | 0.00 |
| 124 | 950.1921 | 8.55E-02  | 0.00 |
| 125 | 950.9881 | 4.04E-02  | 0.00 |
| 126 | 953.594  | -1.76E-01 | 0.00 |
| 127 | 954.5276 | -1.63E-01 | 0.00 |
| 128 | 958.3974 | 2.49E-01  | 0.00 |
| 129 | 959.0347 | 7.96E-02  | 0.00 |
| 130 | 962.6043 | -4.61E-02 | 0.00 |
| 131 | 965.5326 | -7.17E-01 | 0.00 |
| 132 | 968.4839 | -4.50E-01 | 0.00 |
| 133 | 969.2695 | 1.61E-01  | 0.00 |
| 134 | 975.9384 | 1.26E+00  | 0.00 |
| 135 | 977.5501 | 3.81E-01  | 0.00 |
| 136 | 979.6227 | 1.57E-02  | 0.00 |
| 137 | 980.3581 | 3.84E-01  | 0.00 |
| 138 | 984.0867 | 2.92E-01  | 0.00 |
| 139 | 987.8843 | -9.13E-01 | 0.00 |
| 140 | 991.7312 | 2.82E-02  | 0.00 |
| 141 | 991.9496 | -1.17E+00 | 0.00 |
| 142 | 996.0014 | 6.39E-01  | 0.00 |
| 143 | 996.7712 | -3.42E-01 | 0.00 |
| 144 | 1004.356 | -3.02E-01 | 0.00 |
| 145 | 1015.647 | -3.85E-02 | 0.00 |
| 146 | 1019.575 | -2.90E-02 | 0.00 |
| 147 | 1021.116 | -9.97E-01 | 0.00 |
| 148 | 1035.58  | 6.23E-01  | 0.00 |
| 149 | 1040.569 | 2.14E+00  | 0.01 |
| 150 | 1048.544 | -6.48E+00 | 0.10 |
| 151 | 1063.649 | -1.91E-01 | 0.00 |
| 152 | 1068.255 | -2.52E-01 | 0.00 |
| 153 | 1071.192 | 5.26E-01  | 0.00 |
| 154 | 1074.005 | 2.59E-01  | 0.00 |
| 155 | 1078.772 | 1.84E-01  | 0.00 |
| 156 | 1088.341 | -3.11E+00 | 0.02 |
| 157 | 1089.581 | -1.36E+00 | 0.00 |
| 158 | 1093.141 | 6.13E+00  | 0.09 |
| 159 | 1113.567 | 2.55E-01  | 0.00 |
| 160 | 1128.077 | -4.62E+00 | 0.06 |
| 161 | 1134.63  | 2.36E+00  | 0.01 |
| 162 | 1138.469 | 4.16E+00  | 0.05 |
| 163 | 1149.938 | -1.28E-01 | 0.00 |
| 164 | 1158.704 | -3.94E-02 | 0.00 |
| 165 | 1161.533 | 6.73E-01  | 0.00 |
| 166 | 1173.061 | -4.01E-02 | 0.00 |
| 167 | 1189.283 | 7.27E-01  | 0.00 |
| 168 | 1191.632 | -2.23E-01 | 0.00 |
| 169 | 1193.614 | -3.24E+00 | 0.03 |
| 170 | 1194.693 | -6.93E-01 | 0.00 |
| 171 | 1198.165 | 6.98E-03  | 0.00 |
| 172 | 1210.56  | -1.74E-01 | 0.00 |

|     |          |           |      |
|-----|----------|-----------|------|
| 173 | 1240.381 | -5.79E-01 | 0.00 |
| 174 | 1254.485 | 3.85E+00  | 0.04 |
| 175 | 1265.265 | -7.01E-02 | 0.00 |
| 176 | 1278.342 | 1.14E+00  | 0.00 |
| 177 | 1282.89  | 2.06E+00  | 0.01 |
| 178 | 1292.975 | -4.86E-01 | 0.00 |
| 179 | 1318.965 | 3.61E+00  | 0.04 |
| 180 | 1328.606 | 9.79E+00  | 0.29 |
| 181 | 1332.181 | -2.69E+00 | 0.02 |
| 182 | 1337.49  | 2.03E+00  | 0.01 |
| 183 | 1339.973 | 9.67E-02  | 0.00 |
| 184 | 1346.29  | -1.01E-01 | 0.00 |
| 185 | 1362.212 | -1.37E+00 | 0.01 |
| 186 | 1367.034 | 6.91E-01  | 0.00 |
| 187 | 1391.949 | -1.11E-01 | 0.00 |
| 188 | 1406.971 | 3.51E+00  | 0.04 |
| 189 | 1422.189 | 4.83E-01  | 0.00 |
| 190 | 1426.145 | 3.62E+00  | 0.04 |
| 191 | 1447.392 | 3.32E-02  | 0.00 |
| 192 | 1455.115 | -2.43E+00 | 0.02 |
| 193 | 1467.628 | 1.65E+00  | 0.01 |
| 194 | 1468.772 | -4.63E+00 | 0.07 |
| 195 | 1474.685 | 2.89E-01  | 0.00 |
| 196 | 1484.545 | 2.90E+00  | 0.03 |
| 197 | 1489.741 | 1.73E-01  | 0.00 |
| 198 | 1491.371 | 2.54E-01  | 0.00 |
| 199 | 1509.468 | -3.94E-02 | 0.00 |
| 200 | 1513.325 | -8.35E-02 | 0.00 |
| 201 | 1526.669 | -1.21E+00 | 0.01 |
| 202 | 1533.485 | -2.32E-01 | 0.00 |
| 203 | 1563.105 | -8.28E+00 | 0.24 |
| 204 | 1574.544 | -3.73E-01 | 0.00 |
| 205 | 1583.357 | 5.44E-01  | 0.00 |
| 206 | 1612.097 | -1.15E+00 | 0.00 |
| 207 | 1618.108 | 5.38E-02  | 0.00 |
| 208 | 1628.577 | 4.35E+00  | 0.07 |
| 209 | 1637.796 | -7.52E-02 | 0.00 |
| 210 | 1642.932 | -4.95E+00 | 0.09 |
| 211 | 1650.813 | 1.53E-01  | 0.00 |
| 212 | 1668.34  | 2.04E-01  | 0.00 |
| 213 | 1680.648 | -1.04E-01 | 0.00 |
| 214 | 1686.421 | 3.44E-01  | 0.00 |
| 215 | 1703.713 | -2.77E-02 | 0.00 |
| 216 | 2683.743 | 2.68E-02  | 0.00 |
| 217 | 2686.329 | 4.04E-02  | 0.00 |
| 218 | 2686.549 | 9.19E-02  | 0.00 |
| 219 | 2689.87  | -2.11E-02 | 0.00 |
| 220 | 2694.925 | -2.54E-02 | 0.00 |
| 221 | 2695.602 | -2.68E-03 | 0.00 |
| 222 | 2704.804 | -1.70E-01 | 0.00 |
| 223 | 2719.654 | 1.48E-01  | 0.00 |

|     |          |           |      |
|-----|----------|-----------|------|
| 224 | 2747.308 | -1.57E-01 | 0.00 |
| 225 | 2773.411 | 9.98E-02  | 0.00 |
| 226 | 3204.243 | -1.42E-01 | 0.00 |
| 227 | 3206.928 | 1.58E-03  | 0.00 |
| 228 | 3213.332 | -4.83E-01 | 0.00 |
| 229 | 3215.003 | -9.80E-04 | 0.00 |
| 230 | 3217.135 | -8.08E-02 | 0.00 |
| 231 | 3221.592 | -3.02E-02 | 0.00 |
| 232 | 3227.07  | 5.28E-03  | 0.00 |
| 233 | 3227.392 | -1.16E-02 | 0.00 |
| 234 | 3228.417 | 1.35E-03  | 0.00 |
| 235 | 3233.494 | -1.51E-01 | 0.00 |
| 236 | 3237.14  | -1.01E-01 | 0.00 |
| 237 | 3239.231 | 1.25E-03  | 0.00 |
| 238 | 3240.917 | -9.96E-03 | 0.00 |
| 239 | 3241.146 | -6.10E-02 | 0.00 |
| 240 | 3241.747 | -1.94E-02 | 0.00 |
| 241 | 3243.339 | 1.28E-01  | 0.00 |
| 242 | 3243.828 | -1.93E-02 | 0.00 |
| 243 | 3248.178 | 3.56E-01  | 0.00 |
| 244 | 3248.903 | 1.96E-02  | 0.00 |
| 245 | 3256.734 | 1.12E-01  | 0.00 |
| 246 | 3267.299 | -2.16E-01 | 0.00 |
| 247 | 3268.149 | -1.94E-01 | 0.00 |
| 248 | 3284.925 | 1.03E-03  | 0.00 |
| 249 | 3285.793 | 1.33E-03  | 0.00 |

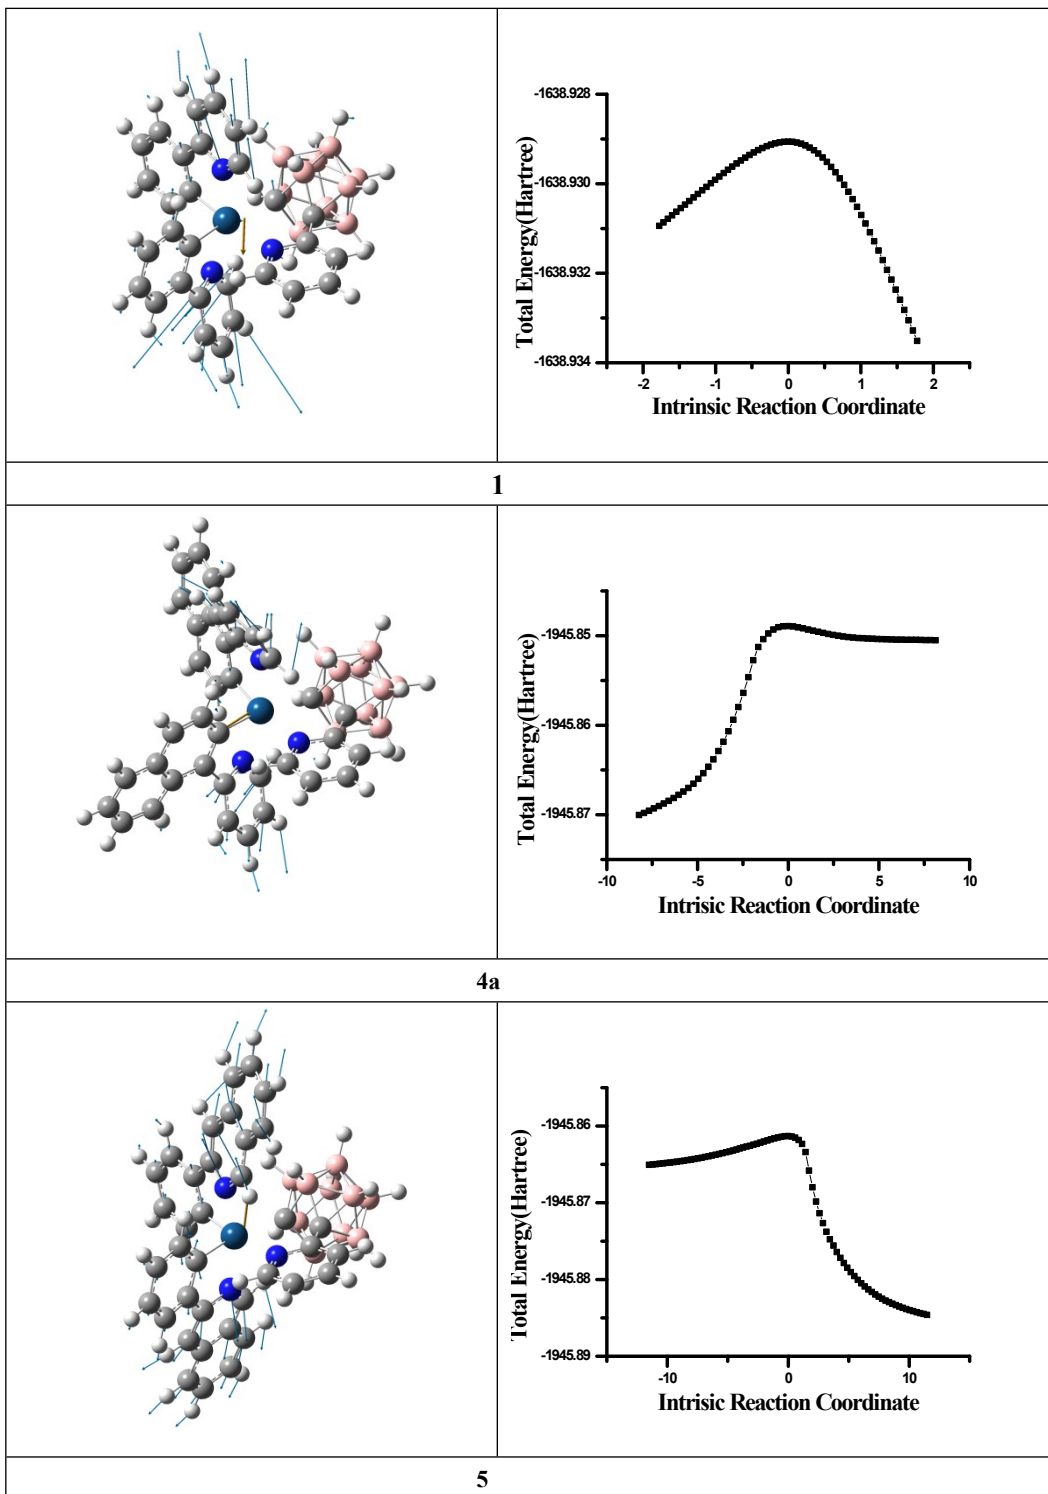

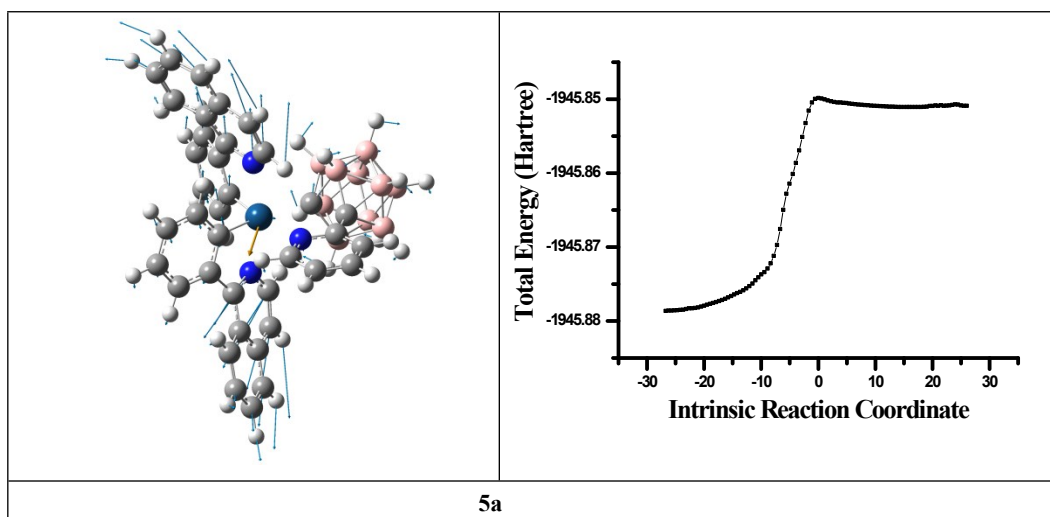

**Figure S1.** The vibration form and the curve of intrinsic reaction coordinate of  ${}^3\text{TS}[\text{}^3\text{ES}/\text{}^3\text{MC}]$  for complexes **1**, **4a**, **5**, **5a**.

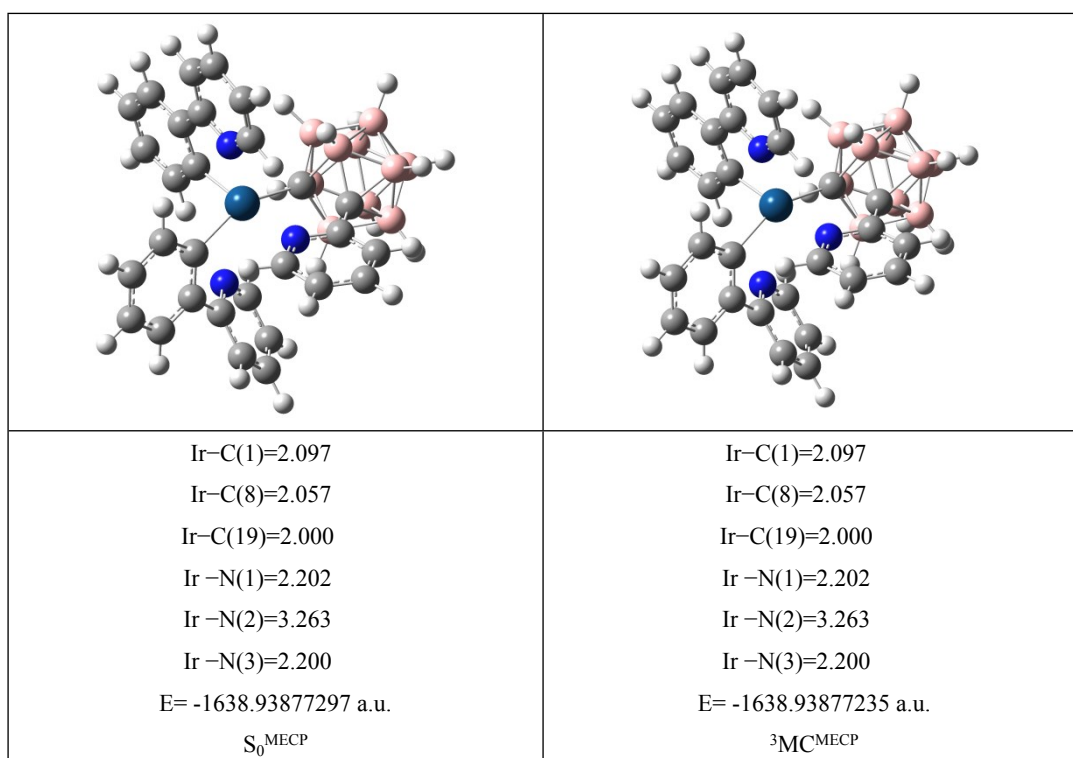

**Figure S2.** Structures of  $S_0$  and  ${}^3\text{MC}$  at MECP for complex **1**.

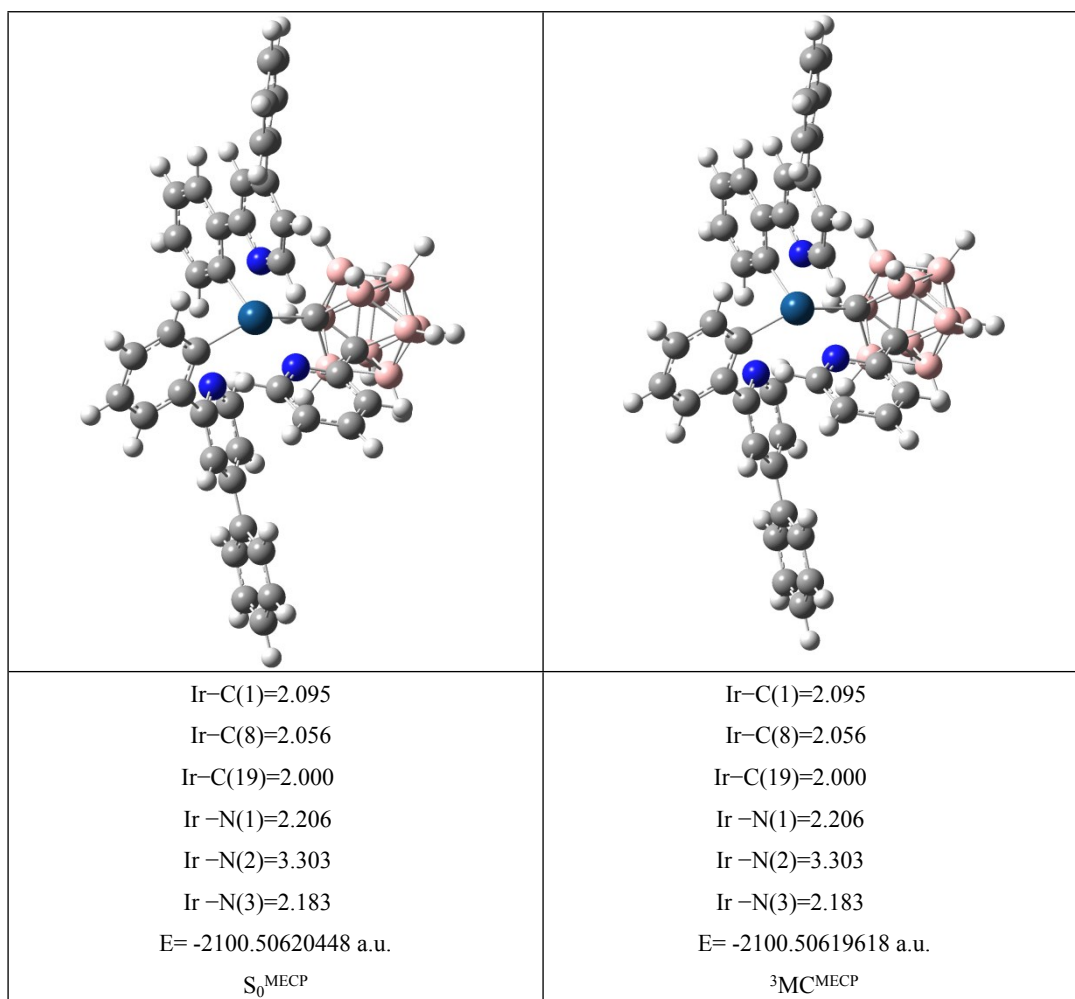

**Figure S3.** Structures of  $S_0$  and  ${}^3\text{MC}$  at MECP for complex 2.

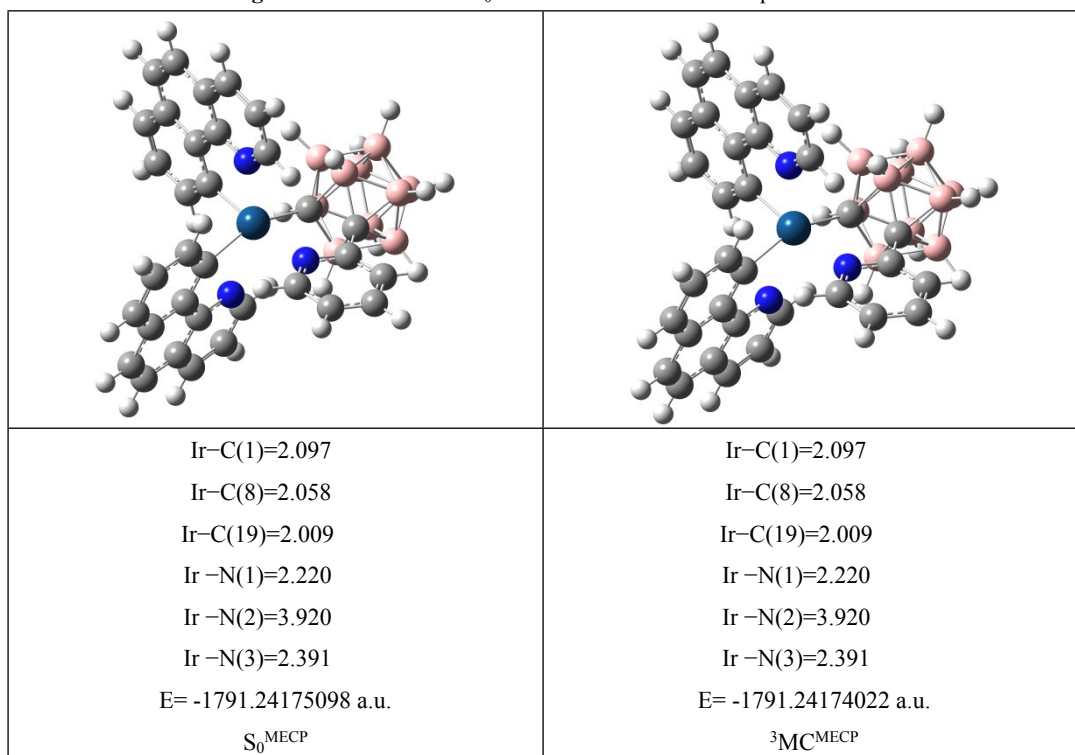

**Figure S4.** Structures of  $S_0$  and  ${}^3\text{MC}$  at MECP for complex 3.

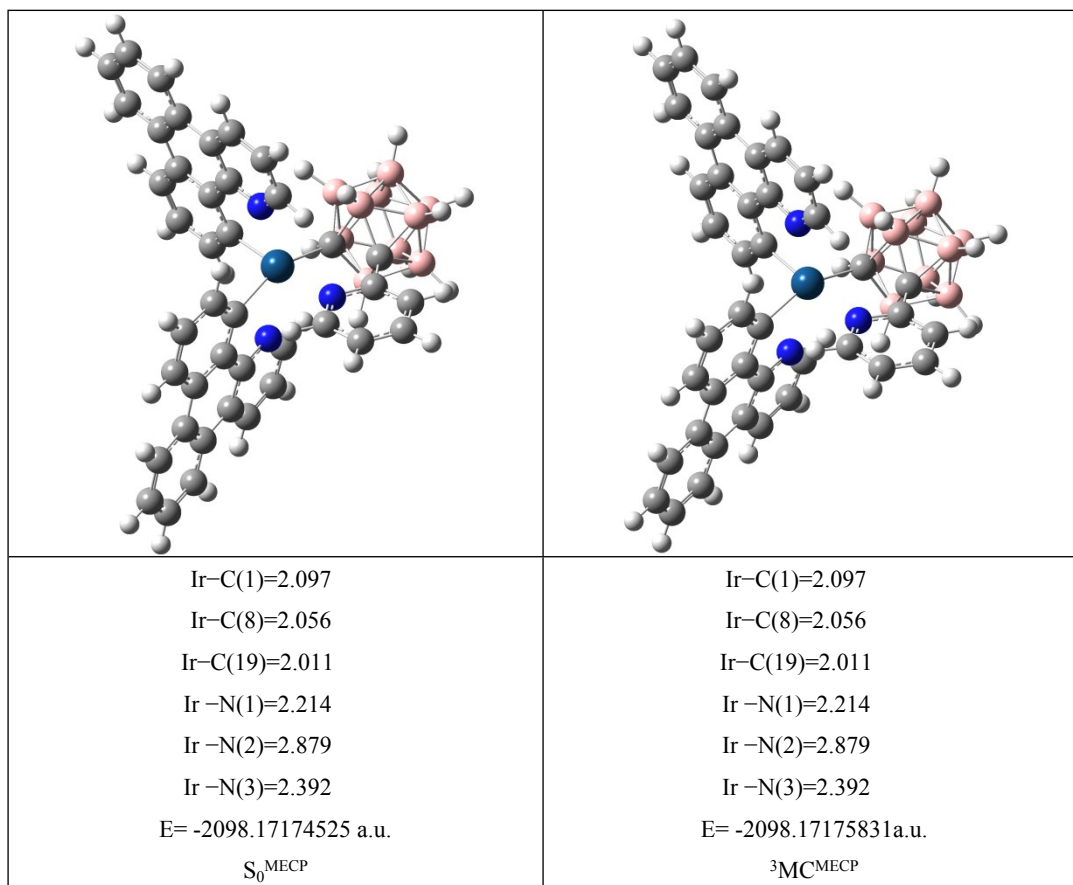

**Figure S5.** Structures of  $S_0$  and  ${}^3\text{MC}$  at MECP for complex **3a**.

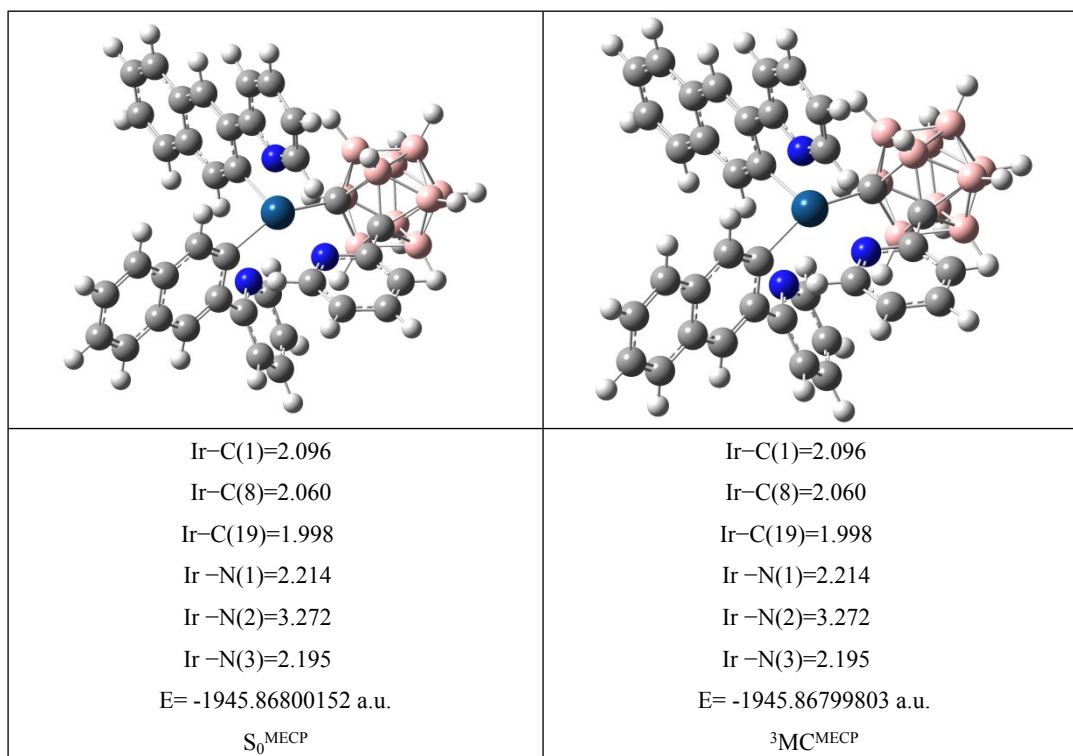

**Figure S6.** Structures of  $S_0$  and  ${}^3\text{MC}$  at MECP for complex **4**.



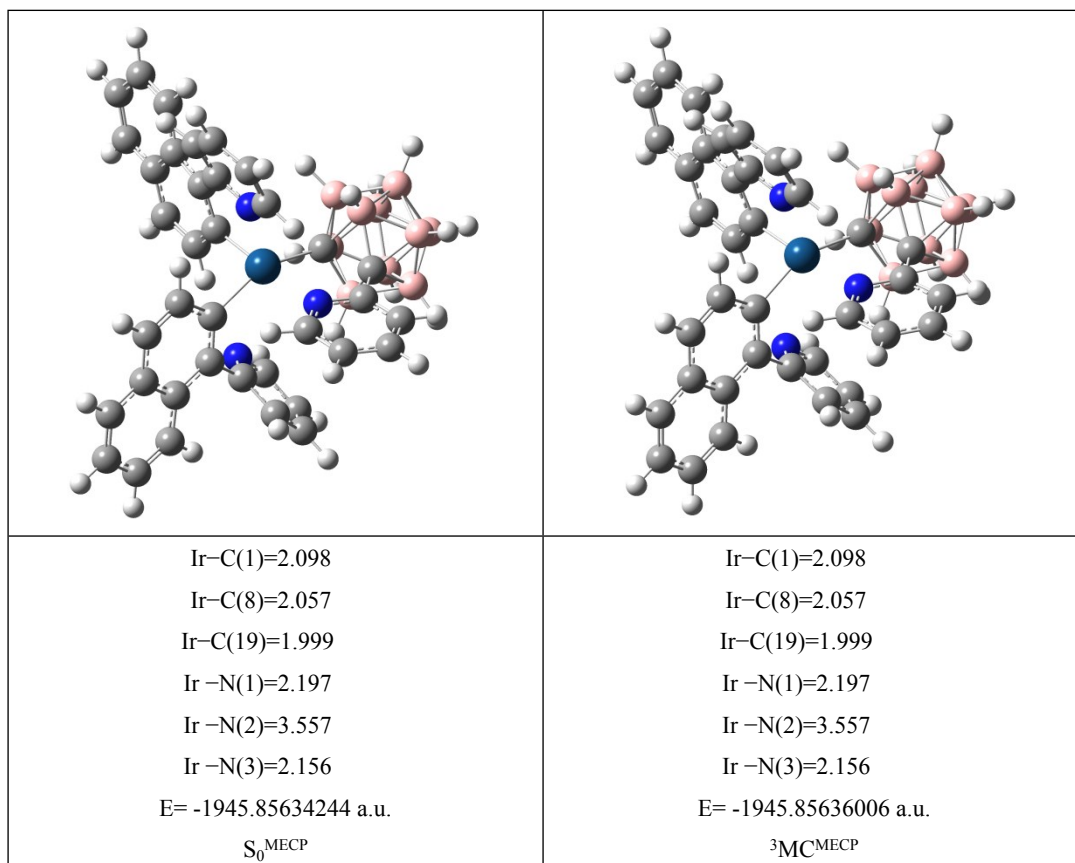

**Figure S7.** Structures of  $S_0$  and  ${}^3\text{MC}$  at MECP for complex **4a**.

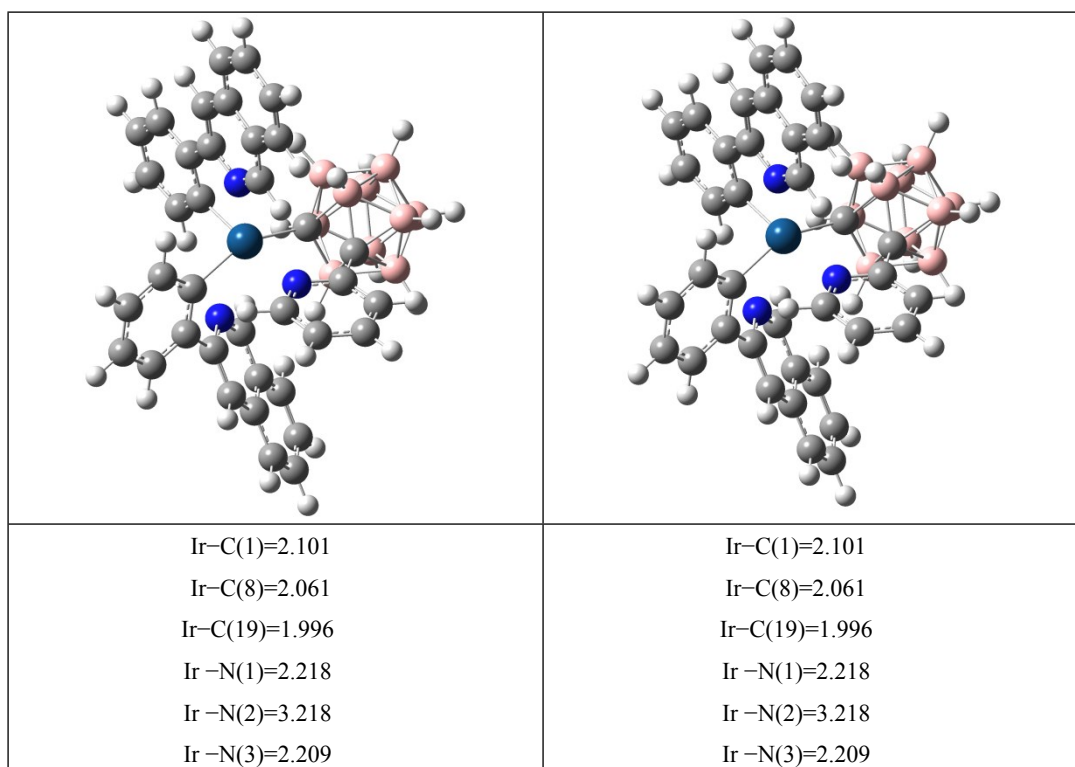

|                                                          |                                                                    |
|----------------------------------------------------------|--------------------------------------------------------------------|
| $E = -1945.86691510 \text{ a.u.}$<br>$S_0^{\text{MECP}}$ | $E = -1945.86690184 \text{ a.u.}$<br>${}^3\text{MC}^{\text{MECP}}$ |
|----------------------------------------------------------|--------------------------------------------------------------------|

**Figure S8.** Structures of  $S_0$  and  ${}^3\text{MC}$  at MECP for complex **5**.

|                                                                                                                                                                                                                                                                 |                                                                                                                                                                                                                                                                           |
|-----------------------------------------------------------------------------------------------------------------------------------------------------------------------------------------------------------------------------------------------------------------|---------------------------------------------------------------------------------------------------------------------------------------------------------------------------------------------------------------------------------------------------------------------------|
| 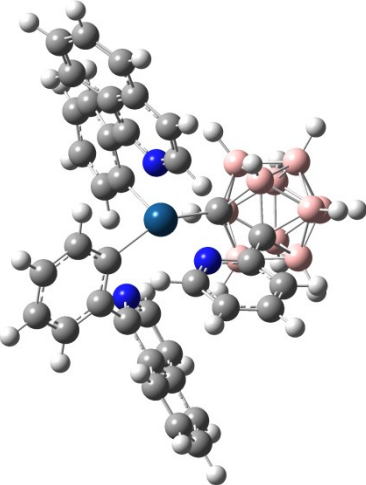                                                                                                                                                                               |                                                                                                                                                                                         |
| $\text{Ir}-\text{C}(1)=2.104$<br>$\text{Ir}-\text{C}(8)=2.057$<br>$\text{Ir}-\text{C}(19)=1.998$<br>$\text{Ir}-\text{N}(1)=2.195$<br>$\text{Ir}-\text{N}(2)=3.448$<br>$\text{Ir}-\text{N}(3)=2.160$<br>$E = -1945.85701513 \text{ a.u.}$<br>$S_0^{\text{MECP}}$ | $\text{Ir}-\text{C}(1)=2.104$<br>$\text{Ir}-\text{C}(8)=2.057$<br>$\text{Ir}-\text{C}(19)=1.998$<br>$\text{Ir}-\text{N}(1)=2.195$<br>$\text{Ir}-\text{N}(2)=3.448$<br>$\text{Ir}-\text{N}(3)=2.160$<br>$E = -1945.85701393 \text{ a.u.}$<br>${}^3\text{MC}^{\text{MECP}}$ |

**Figure S9.** Structures of  $S_0$  and  ${}^3\text{MC}$  at MECP for complex **5a**.
